# Supplementary material for: Integration of Epidemiological and Genomic Data to Investigate H5N1 HPAI Outbreaks in Northern Italy in 2021–2022
Source: MDPI journal article supplement (doi:10.3390/pathogens12010100), 2023-01-06
Supplement: s1 [file s1]

**Supplementary Table S2.** Information from the GISAID EpiFlu database on hemagglutinin segments of the European viruses.

| Segment ID  | Country        | Collecti on date | Isolate-ID        | Isolate name                           | Originating Lab                        | Submitting Lab                                                 | Authors                                                                                                                                                                 |
|-------------|----------------|------------------|-------------------|----------------------------------------|----------------------------------------|----------------------------------------------------------------|-------------------------------------------------------------------------------------------------------------------------------------------------------------------------|
| EPI20149 53 | Poland         | 2022- Feb-05     | EPI_ISL_1192 2811 | A/goose/Poland/H124_22VIR2515- 5/2022  | National Veterinary Research Institute | Istituto Zooprofilattico Sperimentale delle Venezie            | Swieton, E.; Smietanka, K.; Barbierato, G.; Zecchin, B.; Fusaro, A.; Schivo, A.; Salviato, A.; Palumbo, E.; Giussani, E.; Monne, I.; Terregino, C.                      |
| EPI19984 26 | Spain          | 2022- Jan-26     | EPI_ISL_1125 9319 | A/goose/Spain/294-2_22VIR2142-9/2022   | Laboratorio Central de Veterinaria     | Istituto Zooprofilattico Sperimentale delle Venezie            | Ruano, M.J.; Rocha, A.; Sanchez, A.; Agüero, M.; Barbierato, G.; Zecchin, B.; Fusaro, A.; Schivo, A.; Salviato, A.; Palumbo, E.; Giussani, E.; Monne, I.; Terregino, C. |
| EPI19984 18 | Spain          | 2022- Jan-22     | EPI_ISL_1125 9318 | A/goose/Spain/239-1_22VIR2142-8/2022   | Laboratorio Central de Veterinaria     | Istituto Zooprofilattico Sperimentale delle Venezie            | Ruano, M.J.; Rocha, A.; Sanchez, A.; Agüero, M.; Barbierato, G.; Zecchin, B.; Fusaro, A.; Schivo, A.; Salviato, A.; Palumbo, E.; Giussani, E.; Monne, I.; Terregino, C. |
| EPI19984 02 | Spain          | 2022- Jan-14     | EPI_ISL_1125 9316 | A/goose/Spain/141-9_22VIR2142-6/2022   | Laboratorio Central de Veterinaria     | Istituto Zooprofilattico Sperimentale delle Venezie            | Ruano, M.J.; Rocha, A.; Sanchez, A.; Agüero, M.; Barbierato, G.; Zecchin, B.; Fusaro, A.; Schivo, A.; Salviato, A.; Palumbo, E.; Giussani, E.; Monne, I.; Terregino, C. |
| EPI19983 94 | Spain          | 2022- Jan-10     | EPI_ISL_1125 9315 | A/goose/Spain/88-3_22VIR2142-4/2022    | Laboratorio Central de Veterinaria     | Istituto Zooprofilattico Sperimentale delle Venezie            | Ruano, M.J.; Rocha, A.; Sanchez, A.; Agüero, M.; Barbierato, G.; Zecchin, B.; Fusaro, A.; Schivo, A.; Salviato, A.; Palumbo, E.; Giussani, E.; Monne, I.; Terregino, C. |
| EPI19982 98 | Spain          | 2022- Jan-07     | EPI_ISL_1125 9303 | A/goose/Spain/65-3_22VIR2142-2/2022    | Laboratorio Central de Veterinaria     | Istituto Zooprofilattico Sperimentale delle Venezie            | Ruano, M.J.; Rocha, A.; Sanchez, A.; Agüero, M.; Barbierato, G.; Zecchin, B.; Fusaro, A.; Schivo, A.; Salviato, A.; Palumbo, E.; Giussani, E.; Monne, I.; Terregino, C. |
| EPI19981 62 | Spain          | 2022- Feb-04     | EPI_ISL_1125 9286 | A/goose/Spain/512-2_22VIR2142- 13/2022 | Laboratorio Central de Veterinaria     | Istituto Zooprofilattico Sperimentale delle Venezie            | Ruano, M.J.; Rocha, A.; Sanchez, A.; Agüero, M.; Barbierato, G.; Zecchin, B.; Fusaro, A.; Schivo, A.; Salviato, A.; Palumbo, E.; Giussani, E.; Monne, I.; Terregino, C. |
| EPI19981 46 | Ireland        | 2022- Feb-14     | EPI_ISL_1125 9284 | A/goose/Ireland/3869_22VIR2064- 2/2022 | Central Veterinary Research Laboratory | Istituto Zooprofilattico Sperimentale delle Venezie            | Byrne, C.; Garcia, K.; Cuartero, L.G.; Barbierato, G.; Zecchin, B.; Fusaro, A.; Schivo, A.; Salviato, A.; Palumbo, E.; Giussani, E.; Monne, I.; Terregino, C.           |
| EPI19689 21 | France         | 2021- Dec-23     | EPI_ISL_9377 021  | A/goose/France/21P014207/2021          | Anses (Ploufragan-Plouzané)            | ANSES Agence Nationale De Securite Sanitaire De L'alimentation | NA                                                                                                                                                                      |
| EPI19498 98 | France         | 2021- Nov-25     | EPI_ISL_8377 418  | A/goose/France/21P013228/2021          | Anses (Ploufragan-Plouzané)            | ANSES Agence Nationale De Securite Sanitaire De L'alimentation | NA                                                                                                                                                                      |
| EPI18489 34 | United Kingdom | 2021- Feb-10     | EPI_ISL_1123 361  | A/pheasant/Scotland/000348/2021        | Animal and Plant Health Agency (APHA)  | Animal and Plant Health Agency (APHA)                          | NA                                                                                                                                                                      |

| Segment ID  | Country        | Collecti on date | Isolate-ID        | Isolate name                            | Originating Lab                        | Submitting Lab                                      | Authors                                                                                                                                                                                                                                                          |
|-------------|----------------|------------------|-------------------|-----------------------------------------|----------------------------------------|-----------------------------------------------------|------------------------------------------------------------------------------------------------------------------------------------------------------------------------------------------------------------------------------------------------------------------|
| EPI19660 09 | Belgium        | 2022- Jan-04     | EPI_ISL_9162 331  | A/Phasianus_colchicus/Belgium/294/202 2 | Sciensano - Animal Infectious Diseases | Sciensano, Department of Animal Infectious Diseases | Van Borm, Steven; Roupie, Virginie; Lambrecht, Benedicte; Mathijs, Elisabeth; Steensels, Mieke                                                                                                                                                                   |
| EPI20149 77 | Poland         | 2022- Feb-17     | EPI_ISL_1192 2814 | A/swan/Poland/MB083_22VIR2515- 8/2022   | National Veterinary Research Institute | Istituto Zooprofilattico Sperimentale delle Venezie | Swieton, E.; Smietanka, K.; Barbierato, G.; Zecchin, B.; Fusaro, A.; Schivo, A.; Salviato, A.; Palumbo, E.; Giussani, E.; Monne, I.; Terregino, C.                                                                                                               |
| EPI20149 69 | Poland         | 2022- Feb-10     | EPI_ISL_1192 2813 | A/swan/Poland/MB078_22VIR2515- 7/2022   | National Veterinary Research Institute | Istituto Zooprofilattico Sperimentale delle Venezie | Swieton, E.; Smietanka, K.; Barbierato, G.; Zecchin, B.; Fusaro, A.; Schivo, A.; Salviato, A.; Palumbo, E.; Giussani, E.; Monne, I.; Terregino, C.                                                                                                               |
| EPI19982 10 | Spain          | 2021- Dec-22     | EPI_ISL_1125 9292 | A/swan/Spain/4087-1_22VIR2142- 1/2021   | Laboratorio Central de Veterinaria     | Istituto Zooprofilattico Sperimentale delle Venezie | Ruano, M.J.; Rocha, A.; Sanchez, A.; Agüero, M.; Barbierato, G.; Zecchin, B.; Fusaro, A.; Schivo, A.; Salviato, A.; Palumbo, E.; Giussani, E.; Monne, I.; Terregino, C.                                                                                          |
| EPI19951 24 | Slovenia       | 2022- Jan-03     | EPI_ISL_1100 7535 | A/swan/Slovenia/13_22VIR777-8/2022      | University of Ljubljana                | Istituto Zooprofilattico Sperimentale delle Venezie | Slavec, B.; Ražnik, J.; Krapež, U.; Žlabravec, Z.; Ažko, J.; Cociancich, V.; Paller, T.; Vidrih, P.; Rojs, O.Z.; Arseniev, S.; Groza, O.; Barbierato, G.; Zecchin, B.; Fusaro, A.; Schivo, A.; Salviato, A.; Palumbo, E.; Giussani, E.; Monne, I.; Terregino, C. |
| EPI19951 08 | Slovenia       | 2021- Dec-30     | EPI_ISL_1100 7533 | A/swan/Slovenia/2073_22VIR777- 6/2021   | University of Ljubljana                | Istituto Zooprofilattico Sperimentale delle Venezie | Slavec, B.; Ražnik, J.; Krapež, U.; Žlabravec, Z.; Ažko, J.; Cociancich, V.; Paller, T.; Vidrih, P.; Rojs, O.Z.; Arseniev, S.; Groza, O.; Barbierato, G.; Zecchin, B.; Fusaro, A.; Schivo, A.; Salviato, A.; Palumbo, E.; Giussani, E.; Monne, I.; Terregino, C. |
| EPI19951 00 | Slovenia       | 2021- Dec-30     | EPI_ISL_1100 7532 | A/swan/Slovenia/2072_22VIR777- 5/2021   | University of Ljubljana                | Istituto Zooprofilattico Sperimentale delle Venezie | Slavec, B.; Ražnik, J.; Krapež, U.; Žlabravec, Z.; Ažko, J.; Cociancich, V.; Paller, T.; Vidrih, P.; Rojs, O.Z.; Arseniev, S.; Groza, O.; Barbierato, G.; Zecchin, B.; Fusaro, A.; Schivo, A.; Salviato, A.; Palumbo, E.; Giussani, E.; Monne, I.; Terregino, C. |
| EPI19950 92 | Slovenia       | 2021- Dec-29     | EPI_ISL_1100 7531 | A/swan/Slovenia/2060_22VIR777- 4/2021   | University of Ljubljana                | Istituto Zooprofilattico Sperimentale delle Venezie | Slavec, B.; Ražnik, J.; Krapež, U.; Žlabravec, Z.; Ažko, J.; Cociancich, V.; Paller, T.; Vidrih, P.; Rojs, O.Z.; Arseniev, S.; Groza, O.; Barbierato, G.; Zecchin, B.; Fusaro, A.; Schivo, A.; Salviato, A.; Palumbo, E.; Giussani, E.; Monne, I.; Terregino, C. |
| EPI19950 84 | Slovenia       | 2021- Dec-27     | EPI_ISL_1100 7530 | A/swan/Slovenia/2049_22VIR777- 3/2021   | University of Ljubljana                | Istituto Zooprofilattico Sperimentale delle Venezie | Slavec, B.; Ražnik, J.; Krapež, U.; Žlabravec, Z.; Ažko, J.; Cociancich, V.; Paller, T.; Vidrih, P.; Rojs, O.Z.; Arseniev, S.; Groza, O.; Barbierato, G.; Zecchin, B.; Fusaro, A.; Schivo, A.; Salviato, A.; Palumbo, E.; Giussani, E.; Monne, I.; Terregino, C. |
| EPI19950 76 | Slovenia       | 2021- Dec-26     | EPI_ISL_1100 7529 | A/swan/Slovenia/2041_22VIR777- 2/2021   | University of Ljubljana                | Istituto Zooprofilattico Sperimentale delle Venezie | Slavec, B.; Ražnik, J.; Krapež, U.; Žlabravec, Z.; Ažko, J.; Cociancich, V.; Paller, T.; Vidrih, P.; Rojs, O.Z.; Arseniev, S.; Groza, O.; Barbierato, G.; Zecchin, B.; Fusaro, A.; Schivo, A.; Salviato, A.; Palumbo, E.; Giussani, E.; Monne, I.; Terregino, C. |
| EPI18400 56 | United Kingdom | 2020- Dec-03     | EPI_ISL_7668 76   | A/mute_swan/England/234255/2020         | Animal and Plant Health Agency (APHA)  | Animal and Plant Health Agency (APHA)               | NA                                                                                                                                                                                                                                                               |
| EPI19638 97 | United Kingdom | 2021- Nov-09     | EPI_ISL_9029 962  | A/Whooper_swan/Scotland/056219/202 1    | Animal and Plant Health Agency (APHA)  | Animal and Plant Health Agency (APHA)               | NA                                                                                                                                                                                                                                                               |

| Segment ID  | Country        | Collecti on date | Isolate-ID        | Isolate name                                 | Originating Lab                                         | Submitting Lab                                                 | Authors                                                                                                                                                                        |
|-------------|----------------|------------------|-------------------|----------------------------------------------|---------------------------------------------------------|----------------------------------------------------------------|--------------------------------------------------------------------------------------------------------------------------------------------------------------------------------|
| EPI19638 81 | United Kingdom | 2021- Nov-11     | EPI_ISL_9029 960  | A/mute_swan/England/385466/2021              | Animal and Plant Health Agency (APHA)                   | Animal and Plant Health Agency (APHA)                          | NA                                                                                                                                                                             |
| EPI19508 87 | Romania        | 2021- Nov-26     | EPI_ISL_8440 976  | A/mute_swan/Romania/16790_21VIR11 355/2021   | Institute for Diagnosis & Animal Health (IDAH)          | Istituto Zooprofilattico Sperimentale Delle Venezie            | Burlacu, R.; Neicut, A.; Onita, I.; Motiu, R.; Zecchin, B.; Fusaro, A.; Schivo, A.; Salviato, A.; Palumbo, E.; Milani, A.; Giussani, E.; Pastori, A.; Monne, I.; Terregino, C. |
| EPI19508 79 | Romania        | 2021- Nov-11     | EPI_ISL_8440 175  | A/Cygnus_olor/Romania/16381_21VIR10 306/2021 | Institute for Diagnosis & Animal Health (IDAH)          | Istituto Zooprofilattico Sperimentale Delle Venezie            | Burlacu, R.; Neicut, A.; Onita, I.; Motiu, R.; Zecchin, B.; Fusaro, A.; Schivo, A.; Salviato, A.; Palumbo, E.; Milani, A.; Giussani, E.; Pastori, A.; Monne, I.; Terregino, C. |
| EPI19376 71 | Poland         | 2021- Nov-08     | EPI_ISL_6937 114  | A/mute_swan/Poland/MB490-L1/2021             | National Veterinary Research Institut Poland, PIWet-PIB | National Veterinary Research Institut Poland, PIWet-PIB        | E. Swieton, K. Smietanka                                                                                                                                                       |
| EPI19281 48 | France         | 2021- Nov-08     | EPI_ISL_6590 766  | A/swan/France/21P012384/2021                 | Anses (Ploufragan-Plouzané)                             | ANSES Agence Nationale De Securite Sanitaire De L'alimentation | NA                                                                                                                                                                             |
| EPI19241 23 | United Kingdom | 2021- Oct-24     | EPI_ISL_5804 708  | A/mute_swan/England/053054/2021              | Animal and Plant Health Agency (APHA)                   | Animal and Plant Health Agency (APHA)                          | NA                                                                                                                                                                             |
| EPI19983 62 | Spain          | 2022- Feb-15     | EPI_ISL_1125 9311 | A/turkey/Spain/646-7_22VIR2142- 37/2022      | Laboratorio Central de Veterinaria                      | Istituto Zooprofilattico Sperimentale delle Venezie            | Ruano, M.J.; Rocha, A.; Sanchez, A.; Agüero, M.; Barbierato, G.; Zecchin, B.; Fusaro, A.; Schivo, A.; Salviato, A.; Palumbo, E.; Giussani, E.; Monne, I.; Terregino, C.        |
| EPI19983 54 | Spain          | 2022- Feb-15     | EPI_ISL_1125 9310 | A/turkey/Spain/645-1_22VIR2142- 36/2022      | Laboratorio Central de Veterinaria                      | Istituto Zooprofilattico Sperimentale delle Venezie            | Ruano, M.J.; Rocha, A.; Sanchez, A.; Agüero, M.; Barbierato, G.; Zecchin, B.; Fusaro, A.; Schivo, A.; Salviato, A.; Palumbo, E.; Giussani, E.; Monne, I.; Terregino, C.        |
| EPI19983 22 | Spain          | 2022- Feb-14     | EPI_ISL_1125 9306 | A/turkey/Spain/586-4_22VIR2142- 32/2022      | Laboratorio Central de Veterinaria                      | Istituto Zooprofilattico Sperimentale delle Venezie            | Ruano, M.J.; Rocha, A.; Sanchez, A.; Agüero, M.; Barbierato, G.; Zecchin, B.; Fusaro, A.; Schivo, A.; Salviato, A.; Palumbo, E.; Giussani, E.; Monne, I.; Terregino, C.        |
| EPI19982 82 | Spain          | 2022- Feb-09     | EPI_ISL_1125 9301 | A/turkey/Spain/540-26_22VIR2142- 28/2022     | Laboratorio Central de Veterinaria                      | Istituto Zooprofilattico Sperimentale delle Venezie            | Ruano, M.J.; Rocha, A.; Sanchez, A.; Agüero, M.; Barbierato, G.; Zecchin, B.; Fusaro, A.; Schivo, A.; Salviato, A.; Palumbo, E.; Giussani, E.; Monne, I.; Terregino, C.        |
| EPI19982 74 | Spain          | 2022- Feb-08     | EPI_ISL_1125 9300 | A/turkey/Spain/490-24_22VIR2142- 27/2022     | Laboratorio Central de Veterinaria                      | Istituto Zooprofilattico Sperimentale delle Venezie            | Ruano, M.J.; Rocha, A.; Sanchez, A.; Agüero, M.; Barbierato, G.; Zecchin, B.; Fusaro, A.; Schivo, A.; Salviato, A.; Palumbo, E.; Giussani, E.; Monne, I.; Terregino, C.        |
| EPI19982 66 | Spain          | 2022- Feb-08     | EPI_ISL_1125 9299 | A/turkey/Spain/490-22_22VIR2142- 26/2022     | Laboratorio Central de Veterinaria                      | Istituto Zooprofilattico Sperimentale delle Venezie            | Ruano, M.J.; Rocha, A.; Sanchez, A.; Agüero, M.; Barbierato, G.; Zecchin, B.; Fusaro, A.; Schivo, A.; Salviato, A.; Palumbo, E.; Giussani, E.; Monne, I.; Terregino, C.        |

| Segment ID  | Country  | Collecti on date | Isolate-ID        | Isolate name                               | Originating Lab                                                             | Submitting Lab                                      | Authors                                                                                                                                                                |
|-------------|----------|------------------|-------------------|--------------------------------------------|-----------------------------------------------------------------------------|-----------------------------------------------------|------------------------------------------------------------------------------------------------------------------------------------------------------------------------|
| EPI19982 58 | Spain    | 2022- Feb-08     | EPI_ISL_1125 9298 | A/turkey/Spain/489-21_22VIR2142- 25/2022   | Laboratorio Central de Veterinaria                                          | Istituto Zooprofilattico Sperimentale delle Venezie | Ruano, M.J.; Rocha, A.; Sanchez, A.; Agüero, M; Barbierato, G.; Zecchin, B.; Fusaro, A.; Schivo, A.; Salviato, A.; Palumbo, E.; Giussani, E.; Monne, I.; Terregino, C. |
| EPI19982 50 | Spain    | 2022- Feb-06     | EPI_ISL_1125 9297 | A/turkey/Spain/455-96_22VIR2142- 24/2022   | Laboratorio Central de Veterinaria                                          | Istituto Zooprofilattico Sperimentale delle Venezie | Ruano, M.J.; Rocha, A.; Sanchez, A.; Agüero, M; Barbierato, G.; Zecchin, B.; Fusaro, A.; Schivo, A.; Salviato, A.; Palumbo, E.; Giussani, E.; Monne, I.; Terregino, C. |
| EPI19982 42 | Spain    | 2022- Feb-06     | EPI_ISL_1125 9296 | A/turkey/Spain/455-83_22VIR2142- 23/2022   | Laboratorio Central de Veterinaria                                          | Istituto Zooprofilattico Sperimentale delle Venezie | Ruano, M.J.; Rocha, A.; Sanchez, A.; Agüero, M; Barbierato, G.; Zecchin, B.; Fusaro, A.; Schivo, A.; Salviato, A.; Palumbo, E.; Giussani, E.; Monne, I.; Terregino, C. |
| EPI19982 02 | Spain    | 2022- Jan-15     | EPI_ISL_1125 9291 | A/turkey/Spain/140-38_22VIR2142- 19/2022   | Laboratorio Central de Veterinaria                                          | Istituto Zooprofilattico Sperimentale delle Venezie | Ruano, M.J.; Rocha, A.; Sanchez, A.; Agüero, M; Barbierato, G.; Zecchin, B.; Fusaro, A.; Schivo, A.; Salviato, A.; Palumbo, E.; Giussani, E.; Monne, I.; Terregino, C. |
| EPI19980 25 | Ireland  | 2021- Nov-19     | EPI_ISL_1125 9269 | A/turkey/Ireland/033674_22VIR1325- 19/2021 | Central Veterinary Research Laboratory                                      | Istituto Zooprofilattico Sperimentale delle Venezie | Byrne, C.; Garcia, K.; Cuartero, L.G.; Barbierato, G.; Zecchin, B.; Fusaro, A.; Schivo, A.; Salviato, A.; Palumbo, E.; Giussani, E.; Monne, I.; Terregino, C.          |
| EPI19980 09 | Ireland  | 2021- Dec-06     | EPI_ISL_1125 9267 | A/turkey/Ireland/035425_22VIR1325- 17/2021 | Central Veterinary Research Laboratory                                      | Istituto Zooprofilattico Sperimentale delle Venezie | Byrne, C.; Garcia, K.; Cuartero, L.G.; Barbierato, G.; Zecchin, B.; Fusaro, A.; Schivo, A.; Salviato, A.; Palumbo, E.; Giussani, E.; Monne, I.; Terregino, C.          |
| EPI19951 56 | Bulgaria | 2021- Nov-30     | EPI_ISL_1100 7539 | A/turkey/Bulgaria/755-1_22VIR778- 4/2021   | NDRVMI (National Diagnostic and Research Veterinary Medical Institute)      | Istituto Zooprofilattico Sperimentale delle Venezie | Goujgoulova, G.; Slavcheva, I.; Oreshkova, L.; Barbierato, G.; Zecchin, B.; Fusaro, A.; Schivo, A.; Salviato, A.; Palumbo, E.; Giussani, E.; Monne, I.; Terregino, C.  |
| EPI19451 87 | Germany  | 2021- Oct-20     | EPI_ISL_7753 290  | A/turkey/Germany-MV/AI06035/2021           | Landesamt für Landwirtschaft, Lebensmittelsicherhe it und Fischerei (LALLF) | Friedrich-Loeffler- Institut                        | NA                                                                                                                                                                     |
| EPI19438 44 | Germany  | 2021- May-03     | EPI_ISL_5146 481  | A/turkey/Germany-NI/AI04425/2021           | Lebensmittel- und Veterinärinstitut Oldenburg - Standort Veterinärinstitut  | Friedrich-Loeffler- Institut                        | NA                                                                                                                                                                     |
| EPI19438 45 | Germany  | 2021- Apr-27     | EPI_ISL_5146 292  | A/turkey/Germany-NI/AI04373/2021           | Lebensmittel- und Veterinärinstitut Oldenburg - Standort Veterinärinstitut  | Friedrich-Loeffler- Institut                        | NA                                                                                                                                                                     |
| EPI19438 57 | Germany  | 2021- May-05     | EPI_ISL_5145 223  | A/turkey/Germany-NI/AI04455/2021           | Lebensmittel- und Veterinärinstitut Oldenburg - Standort Veterinärinstitut  | Friedrich-Loeffler- Institut                        | NA                                                                                                                                                                     |

| Segment ID  | Country | Collecti on date | Isolate-ID        | Isolate name                                           | Originating Lab                        | Submitting Lab                                      | Authors                                                                                                                                                                 |
|-------------|---------|------------------|-------------------|--------------------------------------------------------|----------------------------------------|-----------------------------------------------------|-------------------------------------------------------------------------------------------------------------------------------------------------------------------------|
| EPI19984 30 | Ireland | 2021- Dec-22     | EPI_ISL_1126 0218 | A/mute_swan/Ireland/037311_22VIR132 5-13/2021          | Central Veterinary Research Laboratory | Istituto Zooprofilattico Sperimentale delle Venezie | Byrne, C.; Garcia, K.; Cuartero, L.G.; Barbierato, G.; Zecchin, B.; Fusaro, A.; Schivo, A.; Salviato, A.; Palumbo, E.; Giussani, E.; Monne, I.; Terregino, C.           |
| EPI19984 10 | Spain   | 2022- Jan-17     | EPI_ISL_1125 9317 | A/stork/Spain/234-2_22VIR2142-7/2022                   | Laboratorio Central de Veterinaria     | Istituto Zooprofilattico Sperimentale delle Venezie | Ruano, M.J.; Rocha, A.; Sanchez, A.; Agüero, M.; Barbierato, G.; Zecchin, B.; Fusaro, A.; Schivo, A.; Salviato, A.; Palumbo, E.; Giussani, E.; Monne, I.; Terregino, C. |
| EPI19983 78 | Spain   | 2022- Jan-11     | EPI_ISL_1125 9313 | A/gray_heron/Spain/88-2_22VIR2142- 3/2022              | Laboratorio Central de Veterinaria     | Istituto Zooprofilattico Sperimentale delle Venezie | Ruano, M.J.; Rocha, A.; Sanchez, A.; Agüero, M.; Barbierato, G.; Zecchin, B.; Fusaro, A.; Schivo, A.; Salviato, A.; Palumbo, E.; Giussani, E.; Monne, I.; Terregino, C. |
| EPI19981 94 | Spain   | 2022- Feb-22     | EPI_ISL_1125 9290 | A/stork/Spain/729-1_22VIR2142- 18/2022                 | Laboratorio Central de Veterinaria     | Istituto Zooprofilattico Sperimentale delle Venezie | Ruano, M.J.; Rocha, A.; Sanchez, A.; Agüero, M.; Barbierato, G.; Zecchin, B.; Fusaro, A.; Schivo, A.; Salviato, A.; Palumbo, E.; Giussani, E.; Monne, I.; Terregino, C. |
| EPI19981 86 | Spain   | 2022- Feb-10     | EPI_ISL_1125 9289 | A/gray_heron/Spain/602-1_22VIR2142- 17/2022            | Laboratorio Central de Veterinaria     | Istituto Zooprofilattico Sperimentale delle Venezie | Ruano, M.J.; Rocha, A.; Sanchez, A.; Agüero, M.; Barbierato, G.; Zecchin, B.; Fusaro, A.; Schivo, A.; Salviato, A.; Palumbo, E.; Giussani, E.; Monne, I.; Terregino, C. |
| EPI19981 78 | Spain   | 2022- Feb-14     | EPI_ISL_1125 9288 | A/common_crane/Spain/597- 2_22VIR2142-15/2022          | Laboratorio Central de Veterinaria     | Istituto Zooprofilattico Sperimentale delle Venezie | Ruano, M.J.; Rocha, A.; Sanchez, A.; Agüero, M.; Barbierato, G.; Zecchin, B.; Fusaro, A.; Schivo, A.; Salviato, A.; Palumbo, E.; Giussani, E.; Monne, I.; Terregino, C. |
| EPI19981 70 | Spain   | 2022- Feb-03     | EPI_ISL_1125 9287 | A/stork/Spain/538-2_22VIR2142- 14/2022                 | Laboratorio Central de Veterinaria     | Istituto Zooprofilattico Sperimentale delle Venezie | Ruano, M.J.; Rocha, A.; Sanchez, A.; Agüero, M.; Barbierato, G.; Zecchin, B.; Fusaro, A.; Schivo, A.; Salviato, A.; Palumbo, E.; Giussani, E.; Monne, I.; Terregino, C. |
| EPI19981 54 | Spain   | 2022- Feb-03     | EPI_ISL_1125 9285 | A/stork/Spain/442-8_22VIR2142- 12/2022                 | Laboratorio Central de Veterinaria     | Istituto Zooprofilattico Sperimentale delle Venezie | Ruano, M.J.; Rocha, A.; Sanchez, A.; Agüero, M.; Barbierato, G.; Zecchin, B.; Fusaro, A.; Schivo, A.; Salviato, A.; Palumbo, E.; Giussani, E.; Monne, I.; Terregino, C. |
| EPI19981 30 | Ireland | 2021- Nov-16     | EPI_ISL_1125 9282 | A/brent_goose/Ireland/033257_22VIR13 25-9/2021         | Central Veterinary Research Laboratory | Istituto Zooprofilattico Sperimentale delle Venezie | Byrne, C.; Garcia, K.; Cuartero, L.G.; Barbierato, G.; Zecchin, B.; Fusaro, A.; Schivo, A.; Salviato, A.; Palumbo, E.; Giussani, E.; Monne, I.; Terregino, C.           |
| EPI19981 22 | Ireland | 2021- Nov-15     | EPI_ISL_1125 9281 | A/white-fronted_goose/Ireland/033181_22VIR13 25-8/2021 | Central Veterinary Research Laboratory | Istituto Zooprofilattico Sperimentale delle Venezie | Byrne, C.; Garcia, K.; Cuartero, L.G.; Barbierato, G.; Zecchin, B.; Fusaro, A.; Schivo, A.; Salviato, A.; Palumbo, E.; Giussani, E.; Monne, I.; Terregino, C.           |
| EPI19981 14 | Ireland | 2021- Nov-15     | EPI_ISL_1125 9280 | A/greylag_goose/Ireland/033062_22VIR1 325-7/2021       | Central Veterinary Research Laboratory | Istituto Zooprofilattico Sperimentale delle Venezie | Byrne, C.; Garcia, K.; Cuartero, L.G.; Barbierato, G.; Zecchin, B.; Fusaro, A.; Schivo, A.; Salviato, A.; Palumbo, E.; Giussani, E.; Monne, I.; Terregino, C.           |

| Segment ID  | Country | Collecti on date | Isolate-ID        | Isolate name                                            | Originating Lab                        | Submitting Lab                                      | Authors                                                                                                                                                       |
|-------------|---------|------------------|-------------------|---------------------------------------------------------|----------------------------------------|-----------------------------------------------------|---------------------------------------------------------------------------------------------------------------------------------------------------------------|
| EPI19981 06 | Ireland | 2021- Nov-15     | EPI_ISL_1125 9279 | A/greylag_goose/Ireland/032969_22VIR1 325-6/2021        | Central Veterinary Research Laboratory | Istituto Zooprofilattico Sperimentale delle Venezie | Byrne, C.; Garcia, K.; Cuartero, L.G.; Barbierato, G.; Zecchin, B.; Fusaro, A.; Schivo, A.; Salviato, A.; Palumbo, E.; Giussani, E.; Monne, I.; Terregino, C. |
| EPI19980 98 | Ireland | 2021- Nov-12     | EPI_ISL_1125 9278 | A/magpie/Ireland/032958_22VIR1325- 5/2021               | Central Veterinary Research Laboratory | Istituto Zooprofilattico Sperimentale delle Venezie | Byrne, C.; Garcia, K.; Cuartero, L.G.; Barbierato, G.; Zecchin, B.; Fusaro, A.; Schivo, A.; Salviato, A.; Palumbo, E.; Giussani, E.; Monne, I.; Terregino, C. |
| EPI19980 90 | Ireland | 2021- Nov-12     | EPI_ISL_1125 9277 | A/whooper_swan/Ireland/032960_22VIR 1325-4/2021         | Central Veterinary Research Laboratory | Istituto Zooprofilattico Sperimentale delle Venezie | Byrne, C.; Garcia, K.; Cuartero, L.G.; Barbierato, G.; Zecchin, B.; Fusaro, A.; Schivo, A.; Salviato, A.; Palumbo, E.; Giussani, E.; Monne, I.; Terregino, C. |
| EPI19980 82 | Ireland | 2021- Nov-10     | EPI_ISL_1125 9276 | A/peregrine_falcon/Ireland/032476_22V IR1325-3/2021     | Central Veterinary Research Laboratory | Istituto Zooprofilattico Sperimentale delle Venezie | Byrne, C.; Garcia, K.; Cuartero, L.G.; Barbierato, G.; Zecchin, B.; Fusaro, A.; Schivo, A.; Salviato, A.; Palumbo, E.; Giussani, E.; Monne, I.; Terregino, C. |
| EPI19980 74 | Ireland | 2021- Nov-09     | EPI_ISL_1125 9275 | A/whooper_swan/Ireland/032444_22VIR 1325-2/2021         | Central Veterinary Research Laboratory | Istituto Zooprofilattico Sperimentale delle Venezie | Byrne, C.; Garcia, K.; Cuartero, L.G.; Barbierato, G.; Zecchin, B.; Fusaro, A.; Schivo, A.; Salviato, A.; Palumbo, E.; Giussani, E.; Monne, I.; Terregino, C. |
| EPI19980 66 | Ireland | 2021- Nov-03     | EPI_ISL_1125 9274 | A/white- tailed_eagle/Ireland/032034_22VIR1325- 23/2021 | Central Veterinary Research Laboratory | Istituto Zooprofilattico Sperimentale delle Venezie | Byrne, C.; Garcia, K.; Cuartero, L.G.; Barbierato, G.; Zecchin, B.; Fusaro, A.; Schivo, A.; Salviato, A.; Palumbo, E.; Giussani, E.; Monne, I.; Terregino, C. |
| EPI19980 50 | Ireland | 2021- Nov-29     | EPI_ISL_1125 9272 | A/layer/Ireland/034424_22VIR1325- 21/2021               | Central Veterinary Research Laboratory | Istituto Zooprofilattico Sperimentale delle Venezie | Byrne, C.; Garcia, K.; Cuartero, L.G.; Barbierato, G.; Zecchin, B.; Fusaro, A.; Schivo, A.; Salviato, A.; Palumbo, E.; Giussani, E.; Monne, I.; Terregino, C. |
| EPI19980 33 | Ireland | 2021- Nov-08     | EPI_ISL_1125 9270 | A/mute_swan/Ireland/032363_22VIR132 5-1/2021            | Central Veterinary Research Laboratory | Istituto Zooprofilattico Sperimentale delle Venezie | Byrne, C.; Garcia, K.; Cuartero, L.G.; Barbierato, G.; Zecchin, B.; Fusaro, A.; Schivo, A.; Salviato, A.; Palumbo, E.; Giussani, E.; Monne, I.; Terregino, C. |
| EPI19980 01 | Ireland | 2021- Nov-19     | EPI_ISL_1125 9266 | A/mute_swan/Ireland/033945_22VIR132 5-16/2021           | Central Veterinary Research Laboratory | Istituto Zooprofilattico Sperimentale delle Venezie | Byrne, C.; Garcia, K.; Cuartero, L.G.; Barbierato, G.; Zecchin, B.; Fusaro, A.; Schivo, A.; Salviato, A.; Palumbo, E.; Giussani, E.; Monne, I.; Terregino, C. |
| EPI19979 93 | Ireland | 2022- Jan-05     | EPI_ISL_1125 9265 | A/peregrine_falcon/Ireland/000191_22V IR1325-15/2022    | Central Veterinary Research Laboratory | Istituto Zooprofilattico Sperimentale delle Venezie | Byrne, C.; Garcia, K.; Cuartero, L.G.; Barbierato, G.; Zecchin, B.; Fusaro, A.; Schivo, A.; Salviato, A.; Palumbo, E.; Giussani, E.; Monne, I.; Terregino, C. |
| EPI19979 85 | Ireland | 2021- Nov-15     | EPI_ISL_1125 9264 | A/mute_swan/Ireland/033169_22VIR132 5-14/2021           | Central Veterinary Research Laboratory | Istituto Zooprofilattico Sperimentale delle Venezie | Byrne, C.; Garcia, K.; Cuartero, L.G.; Barbierato, G.; Zecchin, B.; Fusaro, A.; Schivo, A.; Salviato, A.; Palumbo, E.; Giussani, E.; Monne, I.; Terregino, C. |

| Segment ID  | Country              | Collecti on date | Isolate-ID        | Isolate name                                     | Originating Lab                                                        | Submitting Lab                                                 | Authors                                                                                                                                                                                                                                                          |
|-------------|----------------------|------------------|-------------------|--------------------------------------------------|------------------------------------------------------------------------|----------------------------------------------------------------|------------------------------------------------------------------------------------------------------------------------------------------------------------------------------------------------------------------------------------------------------------------|
| EPI19979 77 | Ireland              | 2022- Jan-07     | EPI_ISL_1125 9263 | A/buzzard/Ireland/000656_22VIR1325- 12/2022      | Central Veterinary Research Laboratory                                 | Istituto Zooprofilattico Sperimentale delle Venezie            | Byrne, C.; Garcia, K.; Cuartero, L.G.; Barbierato, G.; Zecchin, B.; Fusaro, A.; Schivo, A.; Salviato, A.; Palumbo, E.; Giussani, E.; Monne, I.; Terregino, C.                                                                                                    |
| EPI19979 69 | Ireland              | 2021- Dec-08     | EPI_ISL_1125 9262 | A/crow/Ireland/035624_22VIR1325- 11/2021         | Central Veterinary Research Laboratory                                 | Istituto Zooprofilattico Sperimentale delle Venezie            | Byrne, C.; Garcia, K.; Cuartero, L.G.; Barbierato, G.; Zecchin, B.; Fusaro, A.; Schivo, A.; Salviato, A.; Palumbo, E.; Giussani, E.; Monne, I.; Terregino, C.                                                                                                    |
| EPI19979 61 | Ireland              | 2021- Nov-17     | EPI_ISL_1125 9261 | A/herring_gull/Ireland/033533_22VIR13 25-10/2021 | Central Veterinary Research Laboratory                                 | Istituto Zooprofilattico Sperimentale delle Venezie            | Byrne, C.; Garcia, K.; Cuartero, L.G.; Barbierato, G.; Zecchin, B.; Fusaro, A.; Schivo, A.; Salviato, A.; Palumbo, E.; Giussani, E.; Monne, I.; Terregino, C.                                                                                                    |
| EPI19952 36 | Moldova, Republic of | 2022- Jan-03     | EPI_ISL_1100 7721 | A/laying_hen/Moldova/68-2_22VIR638- 2/2022       | Republican Center of Veterinary Diagnostics                            | Istituto Zooprofilattico Sperimentale delle Venezie            | Arseniev, S.; Groza, O.; Barbierato, G.; Zecchin, B.; Fusaro, A.; Schivo, A.; Salviato, A.; Palumbo, E.; Giussani, E.; Monne, I.; Terregino, C.                                                                                                                  |
| EPI19951 72 | Bulgaria             | 2021- Dec-02     | EPI_ISL_1100 7541 | A/hen/Bulgaria/757-6_22VIR778-7/2021             | NDRVMI (National Diagnostic and Research Veterinary Medical Institute) | Istituto Zooprofilattico Sperimentale delle Venezie            | Gougoulova, G.; Slavcheva, I.; Oreshkova, L.; Barbierato, G.; Zecchin, B.; Fusaro, A.; Schivo, A.; Salviato, A.; Palumbo, E.; Giussani, E.; Monne, I.; Terregino, C.                                                                                             |
| EPI19951 48 | Bulgaria             | 2021- Nov-15     | EPI_ISL_1100 7538 | A/hen/Bulgaria/722-1_22VIR778-1/2021             | NDRVMI (National Diagnostic and Research Veterinary Medical Institute) | Istituto Zooprofilattico Sperimentale delle Venezie            | Gougoulova, G.; Slavcheva, I.; Oreshkova, L.; Barbierato, G.; Zecchin, B.; Fusaro, A.; Schivo, A.; Salviato, A.; Palumbo, E.; Giussani, E.; Monne, I.; Terregino, C.                                                                                             |
| EPI19951 40 | Bulgaria             | 2021- Dec-29     | EPI_ISL_1100 7537 | A/hen/Bulgaria/854-1_22VIR778- 10/2021           | NDRVMI (National Diagnostic and Research Veterinary Medical Institute) | Istituto Zooprofilattico Sperimentale delle Venezie            | Gougoulova, G.; Slavcheva, I.; Oreshkova, L.; Barbierato, G.; Zecchin, B.; Fusaro, A.; Schivo, A.; Salviato, A.; Palumbo, E.; Giussani, E.; Monne, I.; Terregino, C.                                                                                             |
| EPI19951 16 | Slovenia             | 2021- Dec-30     | EPI_ISL_1100 7534 | A/seagull/Slovenia/2075_22VIR777- 7/2021         | University of Ljubljana                                                | Istituto Zooprofilattico Sperimentale delle Venezie            | Slavec, B.; Ra?nik, J.; Krape?, U.; ?labravec, Z.; A?ko, J.; Cociancich, V.; Paller, T.; Vidrih, ?.; Rojs, O.Z.; Arseniev, S.; Groza, O.; Barbierato, G.; Zecchin, B.; Fusaro, A.; Schivo, A.; Salviato, A.; Palumbo, E.; Giussani, E.; Monne, I.; Terregino, C. |
| EPI19950 68 | Slovenia             | 2021- Dec-26     | EPI_ISL_1100 7528 | A/rooster/Slovenia/2039_22VIR777- 1/2021         | University of Ljubljana                                                | Istituto Zooprofilattico Sperimentale delle Venezie            | Slavec, B.; Ra?nik, J.; Krape?, U.; ?labravec, Z.; A?ko, J.; Cociancich, V.; Paller, T.; Vidrih, ?.; Rojs, O.Z.; Arseniev, S.; Groza, O.; Barbierato, G.; Zecchin, B.; Fusaro, A.; Schivo, A.; Salviato, A.; Palumbo, E.; Giussani, E.; Monne, I.; Terregino, C. |
| EPI19950 60 | Moldova, Republic of | 2022- Jan-03     | EPI_ISL_1100 7527 | A/laying_hen/Moldova/68-1_22VIR638- 1/2022       | Republican Center of Veterinary Diagnostics                            | Istituto Zooprofilattico Sperimentale delle Venezie            | Arseniev, S.; Groza, O.; Barbierato, G.; Zecchin, B.; Fusaro, A.; Schivo, A.; Salviato, A.; Palumbo, E.; Giussani, E.; Monne, I.; Terregino, C.                                                                                                                  |
| EPI19498 82 | France               | 2021- Dec-03     | EPI_ISL_8377 254  | A/egret/France/21P013418/2021                    | Anses (Ploufragan-Plouzané)                                            | ANSES Agence Nationale De Securite Sanitaire De L'alimentation | NA                                                                                                                                                                                                                                                               |
| EPI19438 54 | Germany              | 2021- Jul-17     | EPI_ISL_5145 744  | A/oystercatcher/Germany- NI/AI05047/2021         | Lebensmittel- und Veterinärinstitut                                    | Friedrich-Loeffler- Institut                                   | NA                                                                                                                                                                                                                                                               |

| Segment ID | Country        | Collecti on date | Isolate-ID       | Isolate name                                   | Originating Lab                                         | Submitting Lab                                          | Authors                                                                                                                                                             |
|------------|----------------|------------------|------------------|------------------------------------------------|---------------------------------------------------------|---------------------------------------------------------|---------------------------------------------------------------------------------------------------------------------------------------------------------------------|
|            |                |                  |                  |                                                | Oldenburg - Standort Veterinärinstitut                  |                                                         |                                                                                                                                                                     |
| EPI1998138 | Ireland        | 2022-Feb-14      | EPI_ISL_11259283 | A/fox/Ireland/3866_22VIR2064-1/2022            | Central Veterinary Research Laboratory                  | Istituto Zooprofilattico Sperimentale delle Venezie     | Byrne, C.; Garcia, K.; Cuartero, L.G.; Barbierato, G.; Zecchin, B.; Fusaro, A.; Schivo, A.; Salviato, A.; Palumbo, E.; Giussani, E.; Monne, I.; Terregino, C.       |
| EPI1945585 | Estonia        | 2021-Nov-08      | EPI_ISL_7778880  | A/Red_fox/Estonia/TA2126820_21VIR10433-13/2021 | Estonian Veterinary and Food Laboratory                 | Istituto Zooprofilattico Sperimentale Delle Venezie     | Nurmoja, I.; Vilem, A.; Juurik, T.; Zecchin, B.; Fusaro, A.; Schivo, A.; Salviato, A.; Palumbo, E.; Milani, A.; Giussani, E.; Pastori, A.; Monne, I.; Terregino, C. |
| EPI1958565 | United Kingdom | 2021-Dec-26      | EPI_ISL_8799552  | A/England/215201407/2021                       | UK Health Security Agency - Colindale                   | UK Health Security Agency (UKHSA)                       | UKHSA, Respiratory Virus Unit                                                                                                                                       |
| EPI1995045 | Netherla nds   | 2022-Jan-29      | EPI_ISL_10993196 | A/Sanderling/Netherlands/1/2022                | Erasmus Medical Center                                  | Erasmus Medical Center                                  | NA                                                                                                                                                                  |
| EPI1995037 | Netherla nds   | 2021-Nov-29      | EPI_ISL_10993166 | A/Mallard/Netherlands/8/2021                   | Erasmus Medical Center                                  | Erasmus Medical Center                                  | NA                                                                                                                                                                  |
| EPI1995029 | Netherla nds   | 2021-Nov-29      | EPI_ISL_10993134 | A/Mallard/Netherlands/7/2021                   | Erasmus Medical Center                                  | Erasmus Medical Center                                  | NA                                                                                                                                                                  |
| EPI1995021 | Netherla nds   | 2021-Nov-29      | EPI_ISL_10993105 | A/Mallard/Netherlands/6/2021                   | Erasmus Medical Center                                  | Erasmus Medical Center                                  | NA                                                                                                                                                                  |
| EPI1995013 | Netherla nds   | 2021-Nov-29      | EPI_ISL_10993076 | A/Mallard/Netherlands/5/2021                   | Erasmus Medical Center                                  | Erasmus Medical Center                                  | NA                                                                                                                                                                  |
| EPI1995005 | Netherla nds   | 2021-Nov-29      | EPI_ISL_10993075 | A/Mallard/Netherlands/4/2021                   | Erasmus Medical Center                                  | Erasmus Medical Center                                  | NA                                                                                                                                                                  |
| EPI1994997 | Netherla nds   | 2022-Feb-14      | EPI_ISL_10993074 | A/Mallard/Netherlands/2/2022                   | Erasmus Medical Center                                  | Erasmus Medical Center                                  | NA                                                                                                                                                                  |
| EPI1994989 | Netherla nds   | 2022-Feb-12      | EPI_ISL_10992813 | A/Mallard/Netherlands/1/2022                   | Erasmus Medical Center                                  | Erasmus Medical Center                                  | NA                                                                                                                                                                  |
| EPI1966970 | Netherla nds   | 2022-Jan-11      | EPI_ISL_9261743  | A/Oystercatcher/Netherlands/1/2022             | Erasmus Medical Center                                  | Erasmus Medical Center                                  | NA                                                                                                                                                                  |
| EPI1963368 | Netherla nds   | 2021-Dec-27      | EPI_ISL_9012580  | A/Mallard/Netherlands/15/2021                  | Erasmus Medical Center                                  | Erasmus Medical Center                                  | NA                                                                                                                                                                  |
| EPI1963360 | Netherla nds   | 2021-Dec-27      | EPI_ISL_9012578  | A/Mallard/Netherlands/14/2021                  | Erasmus Medical Center                                  | Erasmus Medical Center                                  | NA                                                                                                                                                                  |
| EPI1963352 | Netherla nds   | 2021-Dec-27      | EPI_ISL_9012577  | A/Mallard/Netherlands/13/2021                  | Erasmus Medical Center                                  | Erasmus Medical Center                                  | NA                                                                                                                                                                  |
| EPI1945291 | Germany        | 2021-Oct-26      | EPI_ISL_7753443  | A/buzzard/Germany-SH/AI06210/2021              | Landeslabor Schleswig-Holstein                          | Friedrich-Loeffler-Institut                             | NA                                                                                                                                                                  |
| EPI1877873 | Poland         | 2021-Apr-20      | EPI_ISL_2681045  | A/white_stork/Poland/MB391/2021                | National Veterinary Research Institut Poland, PIWet-PIB | National Veterinary Research Institut Poland, PIWet-PIB | Edyta, Swieton; Kamila, Dziadek; Krzysztof, Smietanka                                                                                                               |
| EPI2014961 | Poland         | 2022-Jan-23      | EPI_ISL_11922812 | A/chicken/Poland/H071_22VIR2515-6/2022         | National Veterinary Research Institute                  | Istituto Zooprofilattico                                | Swieton, E.; Smietanka, K.; Barbierato, G.; Zecchin, B.; Fusaro, A.; Schivo, A.; Salviato, A.; Palumbo, E.; Giussani, E.; Monne, I.; Terregino, C.                  |



| Segment ID  | Country | Collecti on date | Isolate-ID        | Isolate name                             | Originating Lab                        | Submitting Lab                                      | Authors                                                                                                                                                                 |
|-------------|---------|------------------|-------------------|------------------------------------------|----------------------------------------|-----------------------------------------------------|-------------------------------------------------------------------------------------------------------------------------------------------------------------------------|
|             |         |                  |                   |                                          |                                        | Sperimentale delle Venezie                          |                                                                                                                                                                         |
| EPI20149 37 | Poland  | 2022-Feb-18      | EPI_ISL_1192 2809 | A/chicken/Poland/H157_22VIR2515-3/2022   | National Veterinary Research Institute | Istituto Zooprofilattico Sperimentale delle Venezie | Swieton, E.; Smietanka, K.; Barbierato, G.; Zecchin, B.; Fusaro, A.; Schivo, A.; Salviato, A.; Palumbo, E.; Giussani, E.; Monne, I.; Terregino, C.                      |
| EPI20099 51 | Germany | 2021-Nov-02      | EPI_ISL_1172 5988 | A/chicken/Germany-BB/AI06242/2021        | Landeslabor Berlin-Brandenburg         | Friedrich-Loeffler-Institut                         | NA                                                                                                                                                                      |
| EPI20099 43 | Germany | 2021-Oct-29      | EPI_ISL_1172 5962 | A/chicken/Germany-BB/AI06219/2021        | Landeslabor Berlin-Brandenburg         | Friedrich-Loeffler-Institut                         | NA                                                                                                                                                                      |
| EPI19983 70 | Spain   | 2022-Feb-16      | EPI_ISL_1125 9312 | A/chicken/Spain/649-6_22VIR2142-38/2022  | Laboratorio Central de Veterinaria     | Istituto Zooprofilattico Sperimentale delle Venezie | Ruano, M.J.; Rocha, A.; Sanchez, A.; Agüero, M.; Barbierato, G.; Zecchin, B.; Fusaro, A.; Schivo, A.; Salviato, A.; Palumbo, E.; Giussani, E.; Monne, I.; Terregino, C. |
| EPI19983 46 | Spain   | 2022-Feb-16      | EPI_ISL_1125 9309 | A/chicken/Spain/644-8_22VIR2142-35/2022  | Laboratorio Central de Veterinaria     | Istituto Zooprofilattico Sperimentale delle Venezie | Ruano, M.J.; Rocha, A.; Sanchez, A.; Agüero, M.; Barbierato, G.; Zecchin, B.; Fusaro, A.; Schivo, A.; Salviato, A.; Palumbo, E.; Giussani, E.; Monne, I.; Terregino, C. |
| EPI19983 38 | Spain   | 2022-Feb-14      | EPI_ISL_1125 9308 | A/chicken/Spain/622-8_22VIR2142-34/2022  | Laboratorio Central de Veterinaria     | Istituto Zooprofilattico Sperimentale delle Venezie | Ruano, M.J.; Rocha, A.; Sanchez, A.; Agüero, M.; Barbierato, G.; Zecchin, B.; Fusaro, A.; Schivo, A.; Salviato, A.; Palumbo, E.; Giussani, E.; Monne, I.; Terregino, C. |
| EPI19983 30 | Spain   | 2022-Feb-14      | EPI_ISL_1125 9307 | A/chicken/Spain/587-1_22VIR2142-33/2022  | Laboratorio Central de Veterinaria     | Istituto Zooprofilattico Sperimentale delle Venezie | Ruano, M.J.; Rocha, A.; Sanchez, A.; Agüero, M.; Barbierato, G.; Zecchin, B.; Fusaro, A.; Schivo, A.; Salviato, A.; Palumbo, E.; Giussani, E.; Monne, I.; Terregino, C. |
| EPI19983 14 | Spain   | 2022-Feb-11      | EPI_ISL_1125 9305 | A/chicken/Spain/564-11_22VIR2142-31/2022 | Laboratorio Central de Veterinaria     | Istituto Zooprofilattico Sperimentale delle Venezie | Ruano, M.J.; Rocha, A.; Sanchez, A.; Agüero, M.; Barbierato, G.; Zecchin, B.; Fusaro, A.; Schivo, A.; Salviato, A.; Palumbo, E.; Giussani, E.; Monne, I.; Terregino, C. |
| EPI19983 06 | Spain   | 2022-Feb-11      | EPI_ISL_1125 9304 | A/chicken/Spain/564-4_22VIR2142-30/2022  | Laboratorio Central de Veterinaria     | Istituto Zooprofilattico Sperimentale delle Venezie | Ruano, M.J.; Rocha, A.; Sanchez, A.; Agüero, M.; Barbierato, G.; Zecchin, B.; Fusaro, A.; Schivo, A.; Salviato, A.; Palumbo, E.; Giussani, E.; Monne, I.; Terregino, C. |
| EPI19982 90 | Spain   | 2022-Feb-11      | EPI_ISL_1125 9302 | A/chicken/Spain/562-1_22VIR2142-29/2022  | Laboratorio Central de Veterinaria     | Istituto Zooprofilattico Sperimentale delle Venezie | Ruano, M.J.; Rocha, A.; Sanchez, A.; Agüero, M.; Barbierato, G.; Zecchin, B.; Fusaro, A.; Schivo, A.; Salviato, A.; Palumbo, E.; Giussani, E.; Monne, I.; Terregino, C. |
| EPI19982 34 | Spain   | 2022-Feb-07      | EPI_ISL_1125 9295 | A/chicken/Spain/452-17_22VIR2142-22/2022 | Laboratorio Central de Veterinaria     | Istituto Zooprofilattico Sperimentale delle Venezie | Ruano, M.J.; Rocha, A.; Sanchez, A.; Agüero, M.; Barbierato, G.; Zecchin, B.; Fusaro, A.; Schivo, A.; Salviato, A.; Palumbo, E.; Giussani, E.; Monne, I.; Terregino, C. |
| EPI19982 26 | Spain   | 2022-Feb-07      | EPI_ISL_1125 9294 | A/chicken/Spain/452-1_22VIR2142-21/2022  | Laboratorio Central de Veterinaria     | Istituto Zooprofilattico Sperimentale delle Venezie | Ruano, M.J.; Rocha, A.; Sanchez, A.; Agüero, M.; Barbierato, G.; Zecchin, B.; Fusaro, A.; Schivo, A.; Salviato, A.; Palumbo, E.; Giussani, E.; Monne, I.; Terregino, C. |

| Segment ID  | Country      | Collecti on date | Isolate-ID        | Isolate name                                | Originating Lab                                                            | Submitting Lab                                                 | Authors                                                                                                                                                                 |
|-------------|--------------|------------------|-------------------|---------------------------------------------|----------------------------------------------------------------------------|----------------------------------------------------------------|-------------------------------------------------------------------------------------------------------------------------------------------------------------------------|
| EPI19982 18 | Spain        | 2022- Jan-31     | EPI_ISL_1125 9293 | A/chicken/Spain/340-37_22VIR2142- 20/2022   | Laboratorio Central de Veterinaria                                         | Istituto Zooprofilattico Sperimentale delle Venezie            | Ruano, M.J.; Rocha, A.; Sanchez, A.; Agüero, M.; Barbierato, G.; Zecchin, B.; Fusaro, A.; Schivo, A.; Salviato, A.; Palumbo, E.; Giussani, E.; Monne, I.; Terregino, C. |
| EPI19980 42 | Ireland      | 2021- Nov-22     | EPI_ISL_1125 9271 | A/broiler/Ireland/033734_22VIR1325- 20/2021 | Central Veterinary Research Laboratory                                     | Istituto Zooprofilattico Sperimentale delle Venezie            | Byrne, C.; Garcia, K.; Cuartero, L.G.; Barbierato, G.; Zecchin, B.; Fusaro, A.; Schivo, A.; Salviato, A.; Palumbo, E.; Giussani, E.; Monne, I.; Terregino, C.           |
| EPI19498 90 | France       | 2021- Nov-25     | EPI_ISL_8377 417  | A/chicken/France/21P013076/2021             | Anses (Ploufragan-Plouzané)                                                | ANSES Agence Nationale De Securite Sanitaire De L'alimentation | NA                                                                                                                                                                      |
| EPI19441 99 | Germany      | 2021- Feb-23     | EPI_ISL_5099 451  | A/chicken/Germany-NI/AI01599/2021           | Lebensmittel- und Veterinärinstitut Oldenburg - Standort Veterinärinstitut | Friedrich-Loeffler- Institut                                   | NA                                                                                                                                                                      |
| EPI19859 04 | Netherla nds | 2021- Oct-25     | EPI_ISL_9856 775  | A/chicken/Netherlands/21037287- 006010/2021 | Wageningen Bioveterinary Research                                          | Wageningen Bioveterinary Research                              | Beerens, Nancy; Harders, Frank; Pritz-Verschuren, Sylvia; Roose, Marit; Venema, Sandra; Germeraad, Evelien; Engelsma, Marc; Heutink, Rene; Luca, Bordes                 |
| EPI19652 37 | Netherla nds | 2022- Jan-22     | EPI_ISL_9111 105  | A/chicken/Netherlands/22001401- 001005/2022 | Wageningen Bioveterinary Research                                          | Wageningen Bioveterinary Research                              | Beerens, Nancy; Harders, Frank; Pritz-Verschuren, Sylvia; Roose, Marit; Venema, Sandra; Germeraad, Evelien; Engelsma, Marc; Heutink, Rene                               |
| EPI19232 52 | Netherla nds | 2021- Oct-22     | EPI_ISL_5588 106  | A/chicken/Netherlands/21037233- 001/2021    | Wageningen Bioveterinary Research                                          | Wageningen Bioveterinary Research                              | Beerens, Nancy; Harders, Frank; Pritz-Verschuren, Sylvia; Roose, Marit; Germeraad, Evelien; Engelsma, Marc; Heutink, Rene                                               |
| EPI19232 44 | Netherla nds | 2021- Oct-25     | EPI_ISL_5588 100  | A/chicken/Netherlands/21037287- 006010/2021 | Wageningen Bioveterinary Research                                          | Wageningen Bioveterinary Research                              | Beerens, Nancy; Harders, Frank; Pritz-Verschuren, Sylvia; Roose, Marit; Germeraad, Evelien; Engelsma, Marc; Heutink, Rene                                               |
| EPI18386 73 | Netherla nds | 2020- Dec-14     | EPI_ISL_7110 55   | A/chicken/Netherlands/20019879- 001005/2020 | Wageningen Bioveterinary Research                                          | Wageningen Bioveterinary Research                              | Beerens, Nancy; Harders, Frank; Pritz-Verschuren, Sylvia; Roose, Marit; Germeraad, Evelien; Engelsma, Marc; Bossers, Alex; Heutink, Rene                                |
| EPI20149 45 | Poland       | 2022- Feb-08     | EPI_ISL_1192 2810 | A/duck/Poland/H126_22VIR2515-4/2022         | National Veterinary Research Institute                                     | Istituto Zooprofilattico Sperimentale delle Venezie            | Swieton, E.; Smietanka, K.; Barbierato, G.; Zecchin, B.; Fusaro, A.; Schivo, A.; Salviato, A.; Palumbo, E.; Giussani, E.; Monne, I.; Terregino, C.                      |
| EPI20149 29 | Poland       | 2022- Mar-02     | EPI_ISL_1192 2808 | A/duck/Poland/H188_22VIR2515-2/2022         | National Veterinary Research Institute                                     | Istituto Zooprofilattico Sperimentale delle Venezie            | Swieton, E.; Smietanka, K.; Barbierato, G.; Zecchin, B.; Fusaro, A.; Schivo, A.; Salviato, A.; Palumbo, E.; Giussani, E.; Monne, I.; Terregino, C.                      |
| EPI19980 58 | Ireland      | 2021- Dec-11     | EPI_ISL_1125 9273 | A/duck/Ireland/036105_22VIR1325- 22/2021    | Central Veterinary Research Laboratory                                     | Istituto Zooprofilattico Sperimentale delle Venezie            | Byrne, C.; Garcia, K.; Cuartero, L.G.; Barbierato, G.; Zecchin, B.; Fusaro, A.; Schivo, A.; Salviato, A.; Palumbo, E.; Giussani, E.; Monne, I.; Terregino, C.           |
| EPI19980 17 | Ireland      | 2021- Dec-17     | EPI_ISL_1125 9268 | A/duck/Ireland/036646_22VIR1325- 18/2021    | Central Veterinary Research Laboratory                                     | Istituto Zooprofilattico                                       | Byrne, C.; Garcia, K.; Cuartero, L.G.; Barbierato, G.; Zecchin, B.; Fusaro, A.; Schivo, A.; Salviato, A.; Palumbo, E.; Giussani, E.; Monne, I.; Terregino, C.           |

| Segment ID  | Country        | Collecti on date | Isolate-ID        | Isolate name                                            | Originating Lab                                                            | Submitting Lab                                                 | Authors                                                                                                                                                                              |
|-------------|----------------|------------------|-------------------|---------------------------------------------------------|----------------------------------------------------------------------------|----------------------------------------------------------------|--------------------------------------------------------------------------------------------------------------------------------------------------------------------------------------|
|             |                |                  |                   |                                                         |                                                                            | Sperimentale delle Venezie                                     |                                                                                                                                                                                      |
| EPI19952 56 | Bulgaria       | 2021- Dec-16     | EPI_ISL_1100 9382 | A/duck/Bulgaria/827-2_22VIR778- 8/2021                  | NDRVMI (National Diagnostic and Research Veterinary Medical Institute)     | Istituto Zooprofilattico Sperimentale Delle Venezie            | Goujgoulova, G.; Slavcheva, I.; Oreshkova, L.; Barbierato, G.; Zecchin, B.; Fusaro, A.; Schivo, A.; Salviato, A.; Palumbo, E.; Giussani, E.; Monne, I.; Terregino, C.                |
| EPI19951 64 | Bulgaria       | 2021- Dec-01     | EPI_ISL_1100 7540 | A/duck/Bulgaria/756-4_22VIR778- 6/2021                  | NDRVMI (National Diagnostic and Research Veterinary Medical Institute)     | Istituto Zooprofilattico Sperimentale delle Venezie            | Goujgoulova, G.; Slavcheva, I.; Oreshkova, L.; Barbierato, G.; Zecchin, B.; Fusaro, A.; Schivo, A.; Salviato, A.; Palumbo, E.; Giussani, E.; Monne, I.; Terregino, C.                |
| EPI19451 63 | Germany        | 2021- Oct-17     | EPI_ISL_7753 230  | A/mallard/Germany-NI/AI06010/2021                       | Lebensmittel- und Veterinärinstitut Oldenburg - Standort Veterinärinstitut | Friedrich-Loeffler- Institut                                   | NA                                                                                                                                                                                   |
| EPI19638 73 | United Kingdom | 2021- Nov-18     | EPI_ISL_9029 959  | A/domestic_duck/England/058612/2021                     | Animal and Plant Health Agency (APHA)                                      | Animal and Plant Health Agency (APHA)                          | NA                                                                                                                                                                                   |
| EPI19376 55 | Poland         | 2021- Nov-07     | EPI_ISL_6934 175  | A/domestic_duck/Poland/H1942-N/2021                     | National Veterinary Research Institut Poland, PIWet-PIB                    | National Veterinary Research Institut Poland, PIWet-PIB        | E. Swieton, K. Smietanka                                                                                                                                                             |
| EPI19542 57 | Croatia        | 2021- Nov-22     | EPI_ISL_8568 483  | A/gadwall/Croatia/108/2021                              | Croatian Veterinary Institute, Poultry Centre                              | Croatian Veterinary Institute                                  | Savić, Vladimir                                                                                                                                                                      |
| EPI19638 89 | United Kingdom | 2021- Nov-01     | EPI_ISL_9029 961  | A/Canada_goose/England/385250/2021                      | Animal and Plant Health Agency (APHA)                                      | Animal and Plant Health Agency (APHA)                          | NA                                                                                                                                                                                   |
| EPI19498 74 | France         | 2021- Dec-15     | EPI_ISL_8377 056  | A/pelican/France/21P013720/2021                         | Anses (Ploufragan-Plouzané)                                                | ANSES Agence Nationale De Securite Sanitaire De L'alimentation | NA                                                                                                                                                                                   |
| EPI19455 38 | Finland        | 2021- Jun-01     | EPI_ISL_7778 775  | A/barnacle_goose/Finland/6955_21VIR7 689-9/2021         | Finnish Food Authority                                                     | Istituto Zooprofilattico Sperimentale Delle Venezie            | Tammiranta, N.; Kantala, T.; Laamanen, I.; Gadd, T.; Zecchin, B.; Fusaro, A.; Schivo, A.; Salviato, A.; Palumbo, E.; Milani, A.; Giussani, E.; Pastori, A.; Monne, I.; Terregino, C. |
| EPI19455 22 | Finland        | 2021- May-01     | EPI_ISL_7778 773  | A/barnacle_goose/Finland/6247_21VIR7 689-6/2021         | Finnish Food Authority                                                     | Istituto Zooprofilattico Sperimentale Delle Venezie            | Tammiranta, N.; Kantala, T.; Laamanen, I.; Gadd, T.; Zecchin, B.; Fusaro, A.; Schivo, A.; Salviato, A.; Palumbo, E.; Milani, A.; Giussani, E.; Pastori, A.; Monne, I.; Terregino, C. |
| EPI19454 85 | Finland        | 2021- Aug-01     | EPI_ISL_7778 768  | A/Eurasian_eagle-owl/Finland/10617_21VIR7689-15/2021    | Finnish Food Authority                                                     | Istituto Zooprofilattico Sperimentale Delle Venezie            | Tammiranta, N.; Kantala, T.; Laamanen, I.; Gadd, T.; Zecchin, B.; Fusaro, A.; Schivo, A.; Salviato, A.; Palumbo, E.; Milani, A.; Giussani, E.; Pastori, A.; Monne, I.; Terregino, C. |
| EPI19454 69 | Finland        | 2021- Aug-01     | EPI_ISL_7778 766  | A/European_herring_gull/Finland/9722_ 21VIR7689-13/2021 | Finnish Food Authority                                                     | Istituto Zooprofilattico                                       | Tammiranta, N.; Kantala, T.; Laamanen, I.; Gadd, T.; Zecchin, B.; Fusaro, A.; Schivo, A.; Salviato, A.; Palumbo, E.; Milani, A.; Giussani, E.; Pastori, A.; Monne, I.; Terregino, C. |

| Segment ID  | Country             | Collecti on date | Isolate-ID        | Isolate name                                               | Originating Lab                                              | Submitting Lab                                               | Authors                                                                                                                                                                             |
|-------------|---------------------|------------------|-------------------|------------------------------------------------------------|--------------------------------------------------------------|--------------------------------------------------------------|-------------------------------------------------------------------------------------------------------------------------------------------------------------------------------------|
|             |                     |                  |                   |                                                            |                                                              | Sperimentale Delle Venezie                                   |                                                                                                                                                                                     |
| EPI19454 61 | Finland             | 2021-Jul-01      | EPI_ISL_7778 765  | A/golden_eagle/Finland/9378_21VIR768 9-12/2021             | Finnish Food Authority                                       | Istituto Zooprofilattico Sperimentale Delle Venezie          | Tamiranta, N.; Kantala, T.; Laamanen, I.; Gadd, T.; Zecchin, B.; Fusaro, A.; Schivo, A.; Salviato, A.; Palumbo, E.; Milani, A.; Giussani, E.; Pastori, A.; Monne, I.; Terregino, C. |
| EPI19454 45 | Finland             | 2021-Jun-01      | EPI_ISL_7778 763  | A/white-tailed_eagle/Finland/6984_21VIR7689-10/2021        | Finnish Food Authority                                       | Istituto Zooprofilattico Sperimentale Delle Venezie          | Tamiranta, N.; Kantala, T.; Laamanen, I.; Gadd, T.; Zecchin, B.; Fusaro, A.; Schivo, A.; Salviato, A.; Palumbo, E.; Milani, A.; Giussani, E.; Pastori, A.; Monne, I.; Terregino, C. |
| EPI19453 89 | Estonia             | 2021-Jun-02      | EPI_ISL_7778 756  | A/gull/Estonia/TA2113284-4_21VIR7512-8/2021                | Estonian Veterinary and Food Laboratory                      | Istituto Zooprofilattico Sperimentale Delle Venezie          | Nurmoja, I.; Vilem, A.; Juurik, T.; Zecchin, B.; Fusaro, A.; Schivo, A.; Salviato, A.; Palumbo, E.; Milani, A.; Giussani, E.; Pastori, A.; Monne, I.; Terregino, C.                 |
| EPI19453 81 | Estonia             | 2021-May-16      | EPI_ISL_7778 755  | A/white-tailed_eagle/Estonia/TA2111864-2_21VIR7512-6/2021  | Estonian Veterinary and Food Laboratory                      | Istituto Zooprofilattico Sperimentale Delle Venezie          | Nurmoja, I.; Vilem, A.; Juurik, T.; Zecchin, B.; Fusaro, A.; Schivo, A.; Salviato, A.; Palumbo, E.; Milani, A.; Giussani, E.; Pastori, A.; Monne, I.; Terregino, C.                 |
| EPI19453 73 | Estonia             | 2021-Oct-12      | EPI_ISL_7778 754  | A/Withe-tiled_eagle/Estonia/TA2124126-1_21VIR10433-11/2021 | Estonian Veterinary and Food Laboratory                      | Istituto Zooprofilattico Sperimentale Delle Venezie          | Nurmoja, I.; Vilem, A.; Juurik, T.; Zecchin, B.; Fusaro, A.; Schivo, A.; Salviato, A.; Palumbo, E.; Milani, A.; Giussani, E.; Pastori, A.; Monne, I.; Terregino, C.                 |
| EPI19889 77 | Belgium             | 2022-Jan-23      | EPI_ISL_1057 6444 | A/Anser_anser/Belgium/1809_0002/202 2                      | Sciensano - Animal Infectious Diseases                       | Sciensano, Department of Animal Infectious Diseases          | Van Borm, Steven; Roupie, Virginie; Lambrecht, Benedicte; Mathijs, Elisabeth; Steensels, Mieke                                                                                      |
| EPI19301 58 | Belgium             | 2021-Nov-04      | EPI_ISL_6761 101  | A/Branta_leucopsis/Belgium/14735_000 1/2021                | Sciensano - Animal Infectious Diseases                       | Sciensano, Department of Animal Infectious Diseases          | Van Borm, Steven; Roupie, Virginie; Lambrecht, Benedicte; Mathijs, Elisabeth; Steensels, Mieke                                                                                      |
| EPI19660 01 | Belgium             | 2021-Dec-27      | EPI_ISL_9161 618  | A/Gallus_gallus/Belgium/17100_0001/20 21                   | Sciensano - Animal Infectious Diseases                       | Sciensano, Department of Animal Infectious Diseases          | Van Borm, Steven; Roupie, Virginie; Lambrecht, Benedicte; Mathijs, Elisabeth; Steensels, Mieke                                                                                      |
| EPI19638 57 | United Kingdom      | 2021-Nov-14      | EPI_ISL_9029 956  | A/chicken/England/057314/2021                              | Animal and Plant Health Agency (APHA)                        | Animal and Plant Health Agency (APHA)                        | NA                                                                                                                                                                                  |
| EPI19630 40 | Russian Federatio n | 2021-Dec-13      | EPI_ISL_9009 317  | A/chicken/Rostov-on-Don/159-7V/2021                        | State Research Center of Virology and Biotechnology (VECTOR) | State Research Center of Virology and Biotechnology (VECTOR) | NA                                                                                                                                                                                  |
| EPI19630 32 | Russian Federatio n | 2021-Dec-13      | EPI_ISL_9009 309  | A/chicken/Rostov-on-Don/159-6V/2021                        | State Research Center of Virology and Biotechnology (VECTOR) | State Research Center of Virology and                        | NA                                                                                                                                                                                  |

| Segment ID | Country            | Collecti on date | Isolate-ID      | Isolate name                        | Originating Lab                                              | Submitting Lab                                               | Authors                                                                                        |
|------------|--------------------|------------------|-----------------|-------------------------------------|--------------------------------------------------------------|--------------------------------------------------------------|------------------------------------------------------------------------------------------------|
|            |                    |                  |                 |                                     |                                                              | Biotechnology (VECTOR)                                       |                                                                                                |
| EPI1963024 | Russian Federation | 2021-Dec-13      | EPI_ISL_9009304 | A/chicken/Rostov-on-Don/159-5V/2021 | State Research Center of Virology and Biotechnology (VECTOR) | State Research Center of Virology and Biotechnology (VECTOR) | NA                                                                                             |
| EPI1963016 | Russian Federation | 2021-Dec-13      | EPI_ISL_9009303 | A/chicken/Rostov-on-Don/159-4V/2021 | State Research Center of Virology and Biotechnology (VECTOR) | State Research Center of Virology and Biotechnology (VECTOR) | NA                                                                                             |
| EPI1963008 | Russian Federation | 2021-Dec-13      | EPI_ISL_9009302 | A/chicken/Rostov-on-Don/159-3V/2021 | State Research Center of Virology and Biotechnology (VECTOR) | State Research Center of Virology and Biotechnology (VECTOR) | NA                                                                                             |
| EPI1963000 | Russian Federation | 2021-Dec-13      | EPI_ISL_9009297 | A/chicken/Rostov-on-Don/159-2V/2021 | State Research Center of Virology and Biotechnology (VECTOR) | State Research Center of Virology and Biotechnology (VECTOR) | NA                                                                                             |
| EPI1962992 | Russian Federation | 2021-Dec-13      | EPI_ISL_9009296 | A/chicken/Rostov-on-Don/159-1V/2021 | State Research Center of Virology and Biotechnology (VECTOR) | State Research Center of Virology and Biotechnology (VECTOR) | NA                                                                                             |
| EPI1962984 | Russian Federation | 2021-Dec-02      | EPI_ISL_9009294 | A/chicken/Stavropol/146-1V/2021     | State Research Center of Virology and Biotechnology (VECTOR) | State Research Center of Virology and Biotechnology (VECTOR) | NA                                                                                             |
| EPI1962976 | Russian Federation | 2021-Nov-27      | EPI_ISL_9009292 | A/chicken/Kursk/132-1V/2021         | State Research Center of Virology and Biotechnology (VECTOR) | State Research Center of Virology and Biotechnology (VECTOR) | NA                                                                                             |
| EPI1962968 | Russian Federation | 2021-Nov-27      | EPI_ISL_9009291 | A/chicken/Kursk/132-1V/2021         | Center of Hygiene and Epidemiology in Kursk Oblast           | State Research Center of Virology and Biotechnology (VECTOR) | NA                                                                                             |
| EPI1951309 | Czech Republic     | 2021-Nov-25      | EPI_ISL_8515480 | A/chicken/Czech_Republic/23404/2021 | State Veterinary Institute Prague                            | State Veterinary Institute Prague                            | Alexander,Nagy;Lenka,Cernikova;Martina,Stara                                                   |
| EPI1946086 | Belgium            | 2021-Dec-06      | EPI_ISL_7880696 | A/Gallus_gallus/Belgium/15977/2021  | Sciensano - Animal Infectious Diseases                       | Sciensano, Department of                                     | Van Borm, Steven; Roupie, Virginie; Lambrecht, Benedicte; Mathijs, Elisabeth; Steensels, Mieke |

| Segment ID | Country        | Collecti on date | Isolate-ID      | Isolate name                                          | Originating Lab                                         | Submitting Lab                                          | Authors                                                                                        |
|------------|----------------|------------------|-----------------|-------------------------------------------------------|---------------------------------------------------------|---------------------------------------------------------|------------------------------------------------------------------------------------------------|
|            |                |                  |                 |                                                       |                                                         | Animal Infectious Diseases                              |                                                                                                |
| EPI1946078 | Belgium        | 2021-Dec-07      | EPI_ISL_7880689 | A/Gallus_gallus/Belgium/16070_003/2021                | Sciensano - Animal Infectious Diseases                  | Sciensano, Department of Animal Infectious Diseases     | Van Borm, Steven; Roupie, Virginie; Lambrecht, Benedicte; Mathijs, Elisabeth; Steensels, Mieke |
| EPI1942186 | Sweden         | 2021-Nov-30      | EPI_ISL_7452805 | A/Chicken/Sweden/SVA211130SZ0427/FB290424-IP-1/M-2021 | National Veterinary Institute, SVA                      | National Veterinary Institute                           | NA                                                                                             |
| EPI1937647 | Poland         | 2021-Nov-05      | EPI_ISL_6931288 | A/chicken/Poland/H1940-N/2021                         | National Veterinary Research Institut Poland, PIWet-PIB | National Veterinary Research Institut Poland, PIWet-PIB | E. Swieton, K. Smietanka                                                                       |
| EPI1937639 | Poland         | 2021-Nov-03      | EPI_ISL_6931008 | A/domestic_goose/Poland/H1931-T1/2021                 | National Veterinary Research Institut Poland, PIWet-PIB | National Veterinary Research Institut Poland, PIWet-PIB | E. Swieton, K. Smietanka                                                                       |
| EPI1951301 | Czech Republic | 2021-Nov-18      | EPI_ISL_8515479 | A/goose/Czech_Republic/22608-2/2021                   | State Veterinary Institute Prague                       | State Veterinary Institute Prague                       | Alexander,Nagy;Lenka,Cernikova;Martina,Stara                                                   |
| EPI1951293 | Czech Republic | 2021-Nov-18      | EPI_ISL_8515478 | A/goose/Czech_Republic/22608-1/2021                   | State Veterinary Institute Prague                       | State Veterinary Institute Prague                       | Alexander,Nagy;Lenka,Cernikova;Martina,Stara                                                   |
| EPI1942304 | Croatia        | 2021-Nov-18      | EPI_ISL_7570634 | A/goose/Croatia/107/2021                              | Croatian Veterinary Institute, Poultry Centre           | Croatian Veterinary Institute                           | Savić, Vladimir                                                                                |
| EPI1965994 | Belgium        | 2021-Nov-21      | EPI_ISL_9160206 | A/Anser_albifrons/Belgium/15465_0010/2021             | Sciensano - Animal Infectious Diseases                  | Sciensano, Department of Animal Infectious Diseases     | Van Borm, Steven; Roupie, Virginie; Lambrecht, Benedicte; Mathijs, Elisabeth; Steensels, Mieke |
| EPI1963865 | United Kingdom | 2021-Nov-16      | EPI_ISL_9029957 | A/turkey/England/057679/2021                          | Animal and Plant Health Agency (APHA)                   | Animal and Plant Health Agency (APHA)                   | NA                                                                                             |
| EPI1959924 | United Kingdom | 2021-Nov-10      | EPI_ISL_8814195 | A/turkey/England/056764/2021                          | Animal and Plant Health Agency (APHA)                   | Animal and Plant Health Agency (APHA)                   | NA                                                                                             |
| EPI1959914 | United Kingdom | 2021-Nov-06      | EPI_ISL_8814146 | A/turkey/England/055251/2021                          | Animal and Plant Health Agency (APHA)                   | Animal and Plant Health Agency (APHA)                   | NA                                                                                             |
| EPI1949326 | Sweden         | 2021-Dec-12      | EPI_ISL_8338002 | A/Turkey/Sweden/SVA211212SZ0001/FB301013-IP-2/M-2021  | National Veterinary Institute, SVA                      | National Veterinary Institute                           | 'Siamak, Zohari'                                                                               |
| EPI1937663 | Poland         | 2021-Nov-08      | EPI_ISL_6935584 | A/turkey/Poland/H1944-N/2021                          | National Veterinary Research Institut Poland, PIWet-PIB | National Veterinary Research Institut Poland, PIWet-PIB | E. Swieton, K. Smietanka                                                                       |

| Segment ID  | Country | Collecti on date | Isolate-ID       | Isolate name                  | Originating Lab                                         | Submitting Lab                                          | Authors                  |
|-------------|---------|------------------|------------------|-------------------------------|---------------------------------------------------------|---------------------------------------------------------|--------------------------|
| EPI19376 31 | Poland  | 2021- Nov-03     | EPI_ISL_6930 564 | A/turkey/Poland/H1924-T1/2021 | National Veterinary Research Institut Poland, PIWet-PIB | National Veterinary Research Institut Poland, PIWet-PIB | E. Swieton, K. Smietanka |
| EPI19376 23 | Poland  | 2021- Nov-02     | EPI_ISL_6930 238 | A/turkey/Poland/H1913-T1/2021 | National Veterinary Research Institut Poland, PIWet-PIB | National Veterinary Research Institut Poland, PIWet-PIB | E. Swieton, K. Smietanka |
| EPI19376 15 | Poland  | 2021- Nov-01     | EPI_ISL_6929 970 | A/turkey/Poland/H1911-N/2021  | National Veterinary Research Institut Poland, PIWet-PIB | National Veterinary Research Institut Poland, PIWet-PIB | E. Swieton, K. Smietanka |
| EPI19376 07 | Poland  | 2021- Nov-01     | EPI_ISL_6929 958 | A/turkey/Poland/H1910-T3/2021 | National Veterinary Research Institut Poland, PIWet-PIB | National Veterinary Research Institut Poland, PIWet-PIB | E. Swieton, K. Smietanka |

\*All submitters of data can be contacted directly through the GISAID website (<https://www.gisaid.org>); NA: not available.
