# Supplementary material for: Integration of Epidemiological and Genomic Data to Investigate H5N1 HPAI Outbreaks in Northern Italy in 2021–2022
Source: MDPI journal article supplement (doi:10.3390/pathogens12010100), 2023-01-06
Supplement: s1 [file s1]

**Supplementary Table S1.** Accession numbers of the Italian viruses analyzed.

| Isolate_Id                       | PB2        | PB1        | PA         | HA         | NP         | NA         | MP         | NS         | Isolate_Name                          | Present in the phylogenetic network | Subtype |
|----------------------------------|------------|------------|------------|------------|------------|------------|------------|------------|---------------------------------------|-------------------------------------|---------|
| <a href="#">EPI_ISL_14761428</a> | EPI2141766 | EPI2141768 | EPI2141765 | EPI2141770 | EPI2141762 | EPI2141769 | EPI2141764 | EPI2141763 | A/goose/Italy/22VIR1520/2022          |                                     | H5N1    |
| <a href="#">EPI_ISL_14760656</a> | EPI2140311 | EPI2140312 | EPI2140310 | EPI2140314 | EPI2140306 | EPI2140313 | EPI2140309 | EPI2140308 | A/goose/Italy/21VIR10458/2021         | *                                   | H5N1    |
| <a href="#">EPI_ISL_14760611</a> | EPI2139932 | EPI2139933 | EPI2139931 | EPI2139935 | EPI2139928 | EPI2139934 | EPI2139930 | EPI2139929 | A/goose/Italy/IZSLT_21VIR10273/2021   |                                     | H5N1    |
| <a href="#">EPI_ISL_7733645</a>  | EPI1944482 | EPI1944483 | EPI1944481 | EPI1944485 | EPI1944478 | EPI1944484 | EPI1944480 | EPI1944479 | A/goose/Italy/IZSLT-21VIR10273/2021   |                                     | H5N1    |
| <a href="#">EPI_ISL_14761291</a> | EPI2141652 | EPI2141653 | EPI2141651 | EPI2141655 | EPI2141647 | EPI2141654 | EPI2141650 | EPI2141649 | A/guinea_fowl/Italy/22VIR205-4/2022   |                                     | H5N1    |
| <a href="#">EPI_ISL_14760762</a> | EPI2141204 | EPI2141205 | EPI2141203 | EPI2141208 | EPI2141200 | EPI2141206 | EPI2141202 | EPI2141201 | A/guinea_fowl/Italy/21VIR11383-1/2021 | *                                   | H5N1    |
| <a href="#">EPI_ISL_14760745</a> | EPI2141083 | EPI2141084 | EPI2141082 | EPI2141086 | EPI2141078 | EPI2141085 | EPI2141080 | EPI2141079 | A/guinea_fowl/Italy/21VIR11298/2021   | *                                   | H5N1    |
| <a href="#">EPI_ISL_14760638</a> | EPI2140152 | EPI2140153 | EPI2140151 | EPI2140155 | EPI2140148 | EPI2140154 | EPI2140150 | EPI2140149 | A/guinea_fowl/Italy/21VIR10351/2021   | *                                   | H5N1    |
| <a href="#">EPI_ISL_14760633</a> | EPI2140112 | EPI2140113 | EPI2140111 | EPI2140115 | EPI2140108 | EPI2140114 | EPI2140110 | EPI2140109 | A/Guinea_fowl/Italy/21VIR10231/2021   | *                                   | H5N1    |
| <a href="#">EPI_ISL_14760632</a> | EPI2140104 | EPI2140105 | EPI2140103 | EPI2140107 | EPI2140100 | EPI2140106 | EPI2140102 | EPI2140101 | A/Guinea_fowl/Italy/21VIR10216/2021   | *                                   | H5N1    |
| <a href="#">EPI_ISL_14761462</a> | EPI2141793 | EPI2141794 | EPI2141792 | EPI2141796 | EPI2141788 | EPI2141795 | EPI2141791 | EPI2141790 | A/pheasant/Italy/22VIR1953-1/2022     |                                     | H5N1    |
| <a href="#">EPI_ISL_14760730</a> | EPI2140952 | EPI2140953 | EPI2140951 | EPI2140956 | EPI2140948 | EPI2140954 | EPI2140950 | EPI2140949 | A/pheasant/Italy/21VIR11165/2021      | *                                   | H5N1    |
| <a href="#">EPI_ISL_14760728</a> | EPI2140935 | EPI2140936 | EPI2140934 | EPI2140938 | EPI2140930 | EPI2140937 | EPI2140933 | EPI2140932 | A/pheasant/Italy/21VIR11162/2021      | *                                   | H5N1    |
| <a href="#">EPI_ISL_14760637</a> | EPI2140144 | EPI2140145 | EPI2140143 | EPI2140147 | EPI2140140 | EPI2140146 | EPI2140142 | EPI2140141 | A/pheasant/Italy/21VIR10359/2021      | *                                   | H5N1    |
| <a href="#">EPI_ISL_14761383</a> | EPI2141731 | EPI2141732 | EPI2141730 | EPI2141735 | EPI2141727 | EPI2141733 | EPI2141729 | EPI2141728 | A/swan/Italy/22VIR1560/2022           |                                     | H5N1    |
| <a href="#">EPI_ISL_14761281</a> | EPI2141643 | EPI2141644 | EPI2141642 | EPI2141646 | EPI2141639 | EPI2141645 | EPI2141641 | EPI2141640 | A/turkey/Italy/22VIR171-2/2022        |                                     | H5N1    |
| <a href="#">EPI_ISL_14761232</a> | EPI2141581 | EPI2141582 | EPI2141580 | EPI2141585 | EPI2141577 | EPI2141583 | EPI2141579 | EPI2141578 | A/turkey/Italy/21VIR11935/2021        |                                     | H5N1    |
| <a href="#">EPI_ISL_14761199</a> | EPI2141555 | EPI2141556 | EPI2141554 | EPI2141558 | EPI2141550 | EPI2141557 | EPI2141552 | EPI2141551 | A/turkey/Italy/21VIR11772-7/2021      |                                     | H5N1    |
| <a href="#">EPI_ISL_14761152</a> | EPI2141519 | EPI2141520 | EPI2141518 | EPI2141523 | EPI2141515 | EPI2141522 | EPI2141517 | EPI2141516 | A/turkey/Italy/21VIR11661-7/2021      | *                                   | H5N1    |
| <a href="#">EPI_ISL_14761141</a> | EPI2141511 | EPI2141512 | EPI2141510 | EPI2141514 | EPI2141506 | EPI2141513 | EPI2141509 | EPI2141507 | A/turkey/Italy/21VIR11690/2021        | *                                   | H5N1    |
| <a href="#">EPI_ISL_14761129</a> | EPI2141502 | EPI2141503 | EPI2141501 | EPI2141505 | EPI2141498 | EPI2141504 | EPI2141500 | EPI2141499 | A/turkey/Italy/21VIR11692/2021        | *                                   | H5N1    |
| <a href="#">EPI_ISL_14761119</a> | EPI2141493 | EPI2141494 | EPI2141492 | EPI2141496 | EPI2141489 | EPI2141495 | EPI2141491 | EPI2141490 | A/turkey/Italy/21VIR11691/2021        | *                                   | H5N1    |
| <a href="#">EPI_ISL_14761107</a> | EPI2141484 | EPI2141485 | EPI2141483 | EPI2141488 | EPI2141480 | EPI2141487 | EPI2141482 | EPI2141481 | A/turkey/Italy/21VIR11587-2/2021      |                                     | H5N1    |
| <a href="#">EPI_ISL_14761097</a> | EPI2141475 | EPI2141477 | EPI2141474 | EPI2141479 | EPI2141471 | EPI2141478 | EPI2141473 | EPI2141472 | A/turkey/Italy/21VIR11587-1/2021      | *                                   | H5N1    |
| <a href="#">EPI_ISL_14761086</a> | EPI2141467 | EPI2141468 | EPI2141466 | EPI2141470 | EPI2141462 | EPI2141469 | EPI2141464 | EPI2141463 | A/turkey/Italy/21VIR11586-1/2021      | *                                   | H5N1    |
| <a href="#">EPI_ISL_14761031</a> | EPI2141423 | EPI2141424 | EPI2141422 | EPI2141426 | EPI2141418 | EPI2141425 | EPI2141420 | EPI2141419 | A/turkey/Italy/21VIR11596-3/2021      |                                     | H5N1    |
| <a href="#">EPI_ISL_14760999</a> | EPI2141396 | EPI2141397 | EPI2141395 | EPI2141400 | EPI2141392 | EPI2141398 | EPI2141394 | EPI2141393 | A/turkey/Italy/21VIR11504/2021        |                                     | H5N1    |
| <a href="#">EPI_ISL_14760977</a> | EPI2141379 | EPI2141380 | EPI2141377 | EPI2141382 | EPI2141374 | EPI2141381 | EPI2141376 | EPI2141375 | A/turkey/Italy/21VIR11500-3/2021      |                                     | H5N1    |
| <a href="#">EPI_ISL_14760967</a> | EPI2141370 | EPI2141371 | EPI2141369 | EPI2141373 | EPI2141365 | EPI2141372 | EPI2141368 | EPI2141367 | A/turkey/Italy/21VIR11495-5/2021      | *                                   | H5N1    |
| <a href="#">EPI_ISL_14760956</a> | EPI2141361 | EPI2141362 | EPI2141360 | EPI2141364 | EPI2141357 | EPI2141363 | EPI2141359 | EPI2141358 | A/turkey/Italy/21VIR11492-4/2021      | *                                   | H5N1    |
| <a href="#">EPI_ISL_14760923</a> | EPI2141335 | EPI2141336 | EPI2141334 | EPI2141338 | EPI2141330 | EPI2141337 | EPI2141332 | EPI2141331 | A/turkey/Italy/21VIR11503-1/2021      |                                     | H5N1    |
| <a href="#">EPI_ISL_14760913</a> | EPI2141326 | EPI2141327 | EPI2141325 | EPI2141329 | EPI2141322 | EPI2141328 | EPI2141324 | EPI2141323 | A/turkey/Italy/21VIR11499-5/2021      |                                     | H5N1    |
| <a href="#">EPI_ISL_14760902</a> | EPI2141317 | EPI2141318 | EPI2141316 | EPI2141321 | EPI2141313 | EPI2141319 | EPI2141315 | EPI2141314 | A/turkey/Italy/21VIR11506/2021        | *                                   | H5N1    |
| <a href="#">EPI_ISL_14760891</a> | EPI2141308 | EPI2141310 | EPI2141307 | EPI2141312 | EPI2141304 | EPI2141311 | EPI2141306 | EPI2141305 | A/turkey/Italy/21VIR11511/2021        | *                                   | H5N1    |
| <a href="#">EPI_ISL_14760870</a> | EPI2141291 | EPI2141292 | EPI2141290 | EPI2141295 | EPI2141287 | EPI2141293 | EPI2141289 | EPI2141288 | A/turkey/Italy/21VIR11440-2/2021      | *                                   | H5N1    |
| <a href="#">EPI_ISL_14760859</a> | EPI2141282 | EPI2141283 | EPI2141281 | EPI2141286 | EPI2141278 | EPI2141285 | EPI2141280 | EPI2141279 | A/turkey/Italy/21VIR11510/2021        |                                     | H5N1    |

| Isolate_Id                       | PB2        | PB1        | PA         | HA         | NP         | NA         | MP         | NS         | Isolate_Name                      | Present in the phylogenetic network | Subtype |
|----------------------------------|------------|------------|------------|------------|------------|------------|------------|------------|-----------------------------------|-------------------------------------|---------|
| <a href="#">EPI_ISL_14760849</a> | EPI2141274 | EPI2141275 | EPI2141273 | EPI2141277 | EPI2141270 | EPI2141276 | EPI2141272 | EPI2141271 | A/turkey/Italy/21VIR11509/2021    |                                     | H5N1    |
| <a href="#">EPI_ISL_14760814</a> | EPI2141248 | EPI2141249 | EPI2141247 | EPI2141251 | EPI2141243 | EPI2141250 | EPI2141246 | EPI2141244 | A/turkey/Italy/21VIR11396-1/2021  |                                     | H5N1    |
| <a href="#">EPI_ISL_14760784</a> | EPI2141222 | EPI2141223 | EPI2141220 | EPI2141225 | EPI2141217 | EPI2141224 | EPI2141219 | EPI2141218 | A/turkey/Italy/21VIR11386-1/2021  | *                                   | H5N1    |
| <a href="#">EPI_ISL_14760758</a> | EPI2141195 | EPI2141197 | EPI2141194 | EPI2141199 | EPI2141191 | EPI2141198 | EPI2141193 | EPI2141192 | A/turkey/Italy/21VIR11393-3/2021  |                                     | H5N1    |
| <a href="#">EPI_ISL_14760757</a> | EPI2141187 | EPI2141188 | EPI2141186 | EPI2141190 | EPI2141183 | EPI2141189 | EPI2141185 | EPI2141184 | A/turkey/Italy/21VIR11392-2/2021  |                                     | H5N1    |
| <a href="#">EPI_ISL_14760756</a> | EPI2141178 | EPI2141179 | EPI2141177 | EPI2141181 | EPI2141174 | EPI2141180 | EPI2141176 | EPI2141175 | A/turkey/Italy/21VIR11391-3/2021  |                                     | H5N1    |
| <a href="#">EPI_ISL_14760754</a> | EPI2141161 | EPI2141162 | EPI2141160 | EPI2141164 | EPI2141157 | EPI2141163 | EPI2141159 | EPI2141158 | A/turkey/Italy/21VIR11387-1/2021  |                                     | H5N1    |
| <a href="#">EPI_ISL_14760753</a> | EPI2141152 | EPI2141153 | EPI2141151 | EPI2141155 | EPI2141148 | EPI2141154 | EPI2141150 | EPI2141149 | A/turkey/Italy/21VIR11384-1/2021  |                                     | H5N1    |
| <a href="#">EPI_ISL_14760749</a> | EPI2141117 | EPI2141118 | EPI2141116 | EPI2141121 | EPI2141113 | EPI2141119 | EPI2141115 | EPI2141114 | A/turkey/Italy/21VIR11254-1/2021  |                                     | H5N1    |
| <a href="#">EPI_ISL_14760748</a> | EPI2141109 | EPI2141110 | EPI2141108 | EPI2141112 | EPI2141104 | EPI2141111 | EPI2141107 | EPI2141106 | A/turkey/Italy/21VIR11252-1/2021  |                                     | H5N1    |
| <a href="#">EPI_ISL_14760747</a> | EPI2141100 | EPI2141101 | EPI2141099 | EPI2141103 | EPI2141096 | EPI2141102 | EPI2141098 | EPI2141097 | A/turkey/Italy/21VIR11251-1/2021  |                                     | H5N1    |
| <a href="#">EPI_ISL_14760746</a> | EPI2141091 | EPI2141092 | EPI2141090 | EPI2141095 | EPI2141087 | EPI2141094 | EPI2141089 | EPI2141088 | A/turkey/Italy/21VIR11302/2021    | *                                   | H5N1    |
| <a href="#">EPI_ISL_14760743</a> | EPI2141065 | EPI2141066 | EPI2141064 | EPI2141069 | EPI2141061 | EPI2141067 | EPI2141063 | EPI2141062 | A/turkey/Italy/21VIR11237/2021    | *                                   | H5N1    |
| <a href="#">EPI_ISL_14760740</a> | EPI2141039 | EPI2141040 | EPI2141038 | EPI2141043 | EPI2141035 | EPI2141041 | EPI2141037 | EPI2141036 | A/turkey/Italy/21VIR11163/2021    | *                                   | H5N1    |
| <a href="#">EPI_ISL_14760739</a> | EPI2141030 | EPI2141032 | EPI2141029 | EPI2141034 | EPI2141026 | EPI2141033 | EPI2141028 | EPI2141027 | A/turkey/Italy/21VIR11058/2021    | *                                   | H5N1    |
| <a href="#">EPI_ISL_14760729</a> | EPI2140943 | EPI2140944 | EPI2140942 | EPI2140947 | EPI2140939 | EPI2140946 | EPI2140941 | EPI2140940 | A/turkey/Italy/21VIR11164/2021    | *                                   | H5N1    |
| <a href="#">EPI_ISL_14760726</a> | EPI2140917 | EPI2140918 | EPI2140916 | EPI2140921 | EPI2140913 | EPI2140920 | EPI2140915 | EPI2140914 | A/turkey/Italy/21VIR11166/2021    |                                     | H5N1    |
| <a href="#">EPI_ISL_14760725</a> | EPI2140909 | EPI2140910 | EPI2140908 | EPI2140912 | EPI2140904 | EPI2140911 | EPI2140906 | EPI2140905 | A/turkey/Italy/21VIR11007-1/2021  | *                                   | H5N1    |
| <a href="#">EPI_ISL_14760724</a> | EPI2140900 | EPI2140901 | EPI2140899 | EPI2140903 | EPI2140896 | EPI2140902 | EPI2140898 | EPI2140897 | A/turkey/Italy/21VIR11006-1/2021  | *                                   | H5N1    |
| <a href="#">EPI_ISL_14760720</a> | EPI2140865 | EPI2140866 | EPI2140864 | EPI2140869 | EPI2140861 | EPI2140867 | EPI2140863 | EPI2140862 | A/turkey/Italy/21VIR11077-1/2021  | *                                   | H5N1    |
| <a href="#">EPI_ISL_14760708</a> | EPI2140761 | EPI2140762 | EPI2140760 | EPI2140764 | EPI2140756 | EPI2140763 | EPI2140759 | EPI2140758 | A/turkey/Italy/21VIR10988-1/2021  | *                                   | H5N1    |
| <a href="#">EPI_ISL_14760703</a> | EPI2140717 | EPI2140718 | EPI2140716 | EPI2140721 | EPI2140713 | EPI2140719 | EPI2140715 | EPI2140714 | A/turkey/Italy/21VIR10970-3/2021  |                                     | H5N1    |
| <a href="#">EPI_ISL_14760702</a> | EPI2140709 | EPI2140710 | EPI2140708 | EPI2140712 | EPI2140704 | EPI2140711 | EPI2140706 | EPI2140705 | A/turkey/Italy/21VIR10847-1/2021  | *                                   | H5N1    |
| <a href="#">EPI_ISL_14760700</a> | EPI2140691 | EPI2140692 | EPI2140690 | EPI2140695 | EPI2140687 | EPI2140693 | EPI2140689 | EPI2140688 | A/turkey/Italy/21VIR10757-1/2021  | *                                   | H5N1    |
| <a href="#">EPI_ISL_14760699</a> | EPI2140683 | EPI2140684 | EPI2140681 | EPI2140686 | EPI2140678 | EPI2140685 | EPI2140680 | EPI2140679 | A/turkey/Italy/21VIR10930/2021    | *                                   | H5N1    |
| <a href="#">EPI_ISL_14760697</a> | EPI2140665 | EPI2140666 | EPI2140664 | EPI2140669 | EPI2140661 | EPI2140667 | EPI2140663 | EPI2140662 | A/turkey/Italy/21VIR10929/2021    | *                                   | H5N1    |
| <a href="#">EPI_ISL_14760694</a> | EPI2140638 | EPI2140640 | EPI2140637 | EPI2140642 | EPI2140634 | EPI2140641 | EPI2140636 | EPI2140635 | A/turkey/Italy/21VIR10810-1/2021  |                                     | H5N1    |
| <a href="#">EPI_ISL_14760690</a> | EPI2140603 | EPI2140604 | EPI2140602 | EPI2140607 | EPI2140599 | EPI2140605 | EPI2140601 | EPI2140600 | A/turkey/Italy/21VIR10737-1/2021  | *                                   | H5N1    |
| <a href="#">EPI_ISL_14760689</a> | EPI2140594 | EPI2140595 | EPI2140593 | EPI2140598 | EPI2140590 | EPI2140596 | EPI2140592 | EPI2140591 | A/turkey/Italy/21VIR10697-1/2021  | *                                   | H5N1    |
| <a href="#">EPI_ISL_14760687</a> | EPI2140576 | EPI2140578 | EPI2140575 | EPI2140580 | EPI2140572 | EPI2140579 | EPI2140574 | EPI2140573 | A/turkey/Italy/21VIR10855/2021    | *                                   | H5N1    |
| <a href="#">EPI_ISL_14760686</a> | EPI2140568 | EPI2140569 | EPI2140567 | EPI2140571 | EPI2140563 | EPI2140570 | EPI2140565 | EPI2140564 | A/turkey/Italy/21VIR10854/2021    | *                                   | H5N1    |
| <a href="#">EPI_ISL_14760685</a> | EPI2140559 | EPI2140560 | EPI2140558 | EPI2140562 | EPI2140555 | EPI2140561 | EPI2140557 | EPI2140556 | A/turkey/Italy/21VIR10857/2021    | *                                   | H5N1    |
| <a href="#">EPI_ISL_14760684</a> | EPI2140550 | EPI2140551 | EPI2140549 | EPI2140553 | EPI2140546 | EPI2140552 | EPI2140548 | EPI2140547 | A/turkey/Italy/21VIR10852/2021    | *                                   | H5N1    |
| <a href="#">EPI_ISL_14760683</a> | EPI2140541 | EPI2140542 | EPI2140540 | EPI2140545 | EPI2140537 | EPI2140543 | EPI2140539 | EPI2140538 | A/turkey/Italy/21VIR10856/2021    | *                                   | H5N1    |
| <a href="#">EPI_ISL_14760682</a> | EPI2140532 | EPI2140533 | EPI2140531 | EPI2140536 | EPI2140528 | EPI2140534 | EPI2140530 | EPI2140529 | A/turkey/Italy/21VIR10699-1/2021  | *                                   | H5N1    |
| <a href="#">EPI_ISL_14760680</a> | EPI2140514 | EPI2140516 | EPI2140513 | EPI2140518 | EPI2140510 | EPI2140517 | EPI2140512 | EPI2140511 | A/turkey/Italy/21VIR10645-15/2021 | *                                   | H5N1    |
| <a href="#">EPI_ISL_14760679</a> | EPI2140506 | EPI2140507 | EPI2140505 | EPI2140509 | EPI2140501 | EPI2140508 | EPI2140504 | EPI2140502 | A/turkey/Italy/21VIR10636-17/2021 | *                                   | H5N1    |

| Isolate_Id                       | PB2        | PB1        | PA         | HA         | NP         | NA         | MP         | NS         | Isolate_Name                     | Present in the<br>phylogenetic network | Subtype |
|----------------------------------|------------|------------|------------|------------|------------|------------|------------|------------|----------------------------------|----------------------------------------|---------|
| <a href="#">EPI_ISL_14760669</a> | EPI2140417 | EPI2140418 | EPI2140416 | EPI2140421 | EPI2140413 | EPI2140419 | EPI2140415 | EPI2140414 | A/turkey/Italy/21VIR10621-1/2021 | *                                      | H5N1    |
| <a href="#">EPI_ISL_14760668</a> | EPI2140408 | EPI2140409 | EPI2140407 | EPI2140412 | EPI2140404 | EPI2140410 | EPI2140406 | EPI2140405 | A/turkey/Italy/21VIR10617-2/2021 | *                                      | H5N1    |
| <a href="#">EPI_ISL_14760667</a> | EPI2140399 | EPI2140400 | EPI2140398 | EPI2140403 | EPI2140395 | EPI2140402 | EPI2140397 | EPI2140396 | A/turkey/Italy/21VIR10622-1/2021 | *                                      | H5N1    |
| <a href="#">EPI_ISL_14760664</a> | EPI2140373 | EPI2140374 | EPI2140372 | EPI2140376 | EPI2140368 | EPI2140375 | EPI2140371 | EPI2140370 | A/turkey/Italy/21VIR10459-1/2021 | *                                      | H5N1    |
| <a href="#">EPI_ISL_14760663</a> | EPI2140364 | EPI2140365 | EPI2140363 | EPI2140367 | EPI2140360 | EPI2140366 | EPI2140362 | EPI2140361 | A/turkey/Italy/21VIR10524-1/2021 |                                        | H5N1    |
| <a href="#">EPI_ISL_14760660</a> | EPI2140337 | EPI2140338 | EPI2140336 | EPI2140341 | EPI2140333 | EPI2140340 | EPI2140335 | EPI2140334 | A/turkey/Italy/21VIR10471/2021   | *                                      | H5N1    |
| <a href="#">EPI_ISL_14760653</a> | EPI2140284 | EPI2140285 | EPI2140283 | EPI2140288 | EPI2140280 | EPI2140286 | EPI2140282 | EPI2140281 | A/turkey/Italy/21VIR10398/2021   | *                                      | H5N1    |
| <a href="#">EPI_ISL_14760652</a> | EPI2140275 | EPI2140276 | EPI2140274 | EPI2140279 | EPI2140271 | EPI2140278 | EPI2140273 | EPI2140272 | A/turkey/Italy/21VIR10397/2021   | *                                      | H5N1    |
| <a href="#">EPI_ISL_14760650</a> | EPI2140258 | EPI2140259 | EPI2140256 | EPI2140261 | EPI2140253 | EPI2140260 | EPI2140255 | EPI2140254 | A/turkey/Italy/21VIR10395/2021   | *                                      | H5N1    |
| <a href="#">EPI_ISL_14760649</a> | EPI2140249 | EPI2140250 | EPI2140248 | EPI2140252 | EPI2140244 | EPI2140251 | EPI2140247 | EPI2140245 | A/turkey/Italy/21VIR10396/2021   | *                                      | H5N1    |
| <a href="#">EPI_ISL_14760647</a> | EPI2140231 | EPI2140232 | EPI2140230 | EPI2140234 | EPI2140227 | EPI2140233 | EPI2140229 | EPI2140228 | A/turkey/Italy/21VIR10338/2021   | *                                      | H5N1    |
| <a href="#">EPI_ISL_14760634</a> | EPI2140120 | EPI2140121 | EPI2140119 | EPI2140123 | EPI2140116 | EPI2140122 | EPI2140118 | EPI2140117 | A/turkey/Italy/21VIR10103/2021   | *                                      | H5N1    |
| <a href="#">EPI_ISL_14760631</a> | EPI2140096 | EPI2140097 | EPI2140095 | EPI2140099 | EPI2140092 | EPI2140098 | EPI2140094 | EPI2140093 | A/turkey/Italy/21VIR9901-3/2021  | *                                      | H5N1    |
| <a href="#">EPI_ISL_14760630</a> | EPI2140088 | EPI2140089 | EPI2140087 | EPI2140091 | EPI2140084 | EPI2140090 | EPI2140086 | EPI2140085 | A/turkey/Italy/21VIR10092/2021   | *                                      | H5N1    |
| <a href="#">EPI_ISL_14760628</a> | EPI2140072 | EPI2140073 | EPI2140071 | EPI2140075 | EPI2140067 | EPI2140074 | EPI2140070 | EPI2140069 | A/turkey/Italy/21VIR10095/2021   | *                                      | H5N1    |
| <a href="#">EPI_ISL_14760627</a> | EPI2140062 | EPI2140063 | EPI2140061 | EPI2140066 | EPI2140058 | EPI2140064 | EPI2140060 | EPI2140059 | A/turkey/Italy/21VIR10097/2021   | *                                      | H5N1    |
| <a href="#">EPI_ISL_14760623</a> | EPI2140028 | EPI2140029 | EPI2140027 | EPI2140031 | EPI2140024 | EPI2140030 | EPI2140026 | EPI2140025 | A/turkey/Italy/21VIR9949-9/2021  | *                                      | H5N1    |
| <a href="#">EPI_ISL_14760621</a> | EPI2140012 | EPI2140013 | EPI2140011 | EPI2140015 | EPI2140008 | EPI2140014 | EPI2140010 | EPI2140009 | A/turkey/Italy/21VIR9894-3/2021  | *                                      | H5N1    |
| <a href="#">EPI_ISL_14760619</a> | EPI2139996 | EPI2139997 | EPI2139995 | EPI2139999 | EPI2139992 | EPI2139998 | EPI2139994 | EPI2139993 | A/turkey/Italy/21VIR10001/2021   | *                                      | H5N1    |
| <a href="#">EPI_ISL_14760618</a> | EPI2139988 | EPI2139989 | EPI2139987 | EPI2139991 | EPI2139984 | EPI2139990 | EPI2139986 | EPI2139985 | A/turkey/Italy/21VIR9997/2021    | *                                      | H5N1    |
| <a href="#">EPI_ISL_14760617</a> | EPI2139980 | EPI2139981 | EPI2139979 | EPI2139983 | EPI2139976 | EPI2139982 | EPI2139978 | EPI2139977 | A/turkey/Italy/21VIR9999/2021    | *                                      | H5N1    |
| <a href="#">EPI_ISL_14760615</a> | EPI2139964 | EPI2139965 | EPI2139963 | EPI2139967 | EPI2139960 | EPI2139966 | EPI2139962 | EPI2139961 | A/turkey/Italy/21VIR9996/2021    | *                                      | H5N1    |
| <a href="#">EPI_ISL_14760614</a> | EPI2139956 | EPI2139957 | EPI2139955 | EPI2139959 | EPI2139952 | EPI2139958 | EPI2139954 | EPI2139953 | A/turkey/Italy/21VIR9891-21/2021 | *                                      | H5N1    |
| <a href="#">EPI_ISL_14760613</a> | EPI2139948 | EPI2139949 | EPI2139947 | EPI2139951 | EPI2139944 | EPI2139950 | EPI2139946 | EPI2139945 | A/turkey/Italy/21VIR9889-1/2021  | *                                      | H5N1    |
| <a href="#">EPI_ISL_14760609</a> | EPI2139917 | EPI2139918 | EPI2139916 | EPI2139920 | EPI2139913 | EPI2139919 | EPI2139915 | EPI2139914 | A/turkey/Italy/21VIR9839-1/2021  | *                                      | H5N1    |
| <a href="#">EPI_ISL_14760607</a> | EPI2139901 | EPI2139902 | EPI2139900 | EPI2139904 | EPI2139897 | EPI2139903 | EPI2139899 | EPI2139898 | A/turkey/Italy/21VIR9905-2/2021  | *                                      | H5N1    |
| <a href="#">EPI_ISL_14760606</a> | EPI2139893 | EPI2139894 | EPI2139892 | EPI2139896 | EPI2139889 | EPI2139895 | EPI2139891 | EPI2139890 | A/turkey/Italy/21VIR9906-2/2021  | *                                      | H5N1    |
| <a href="#">EPI_ISL_14760601</a> | EPI2139853 | EPI2139854 | EPI2139852 | EPI2139856 | EPI2139849 | EPI2139855 | EPI2139851 | EPI2139850 | A/turkey/Italy/21VIR9903-2/2021  | *                                      | H5N1    |
| <a href="#">EPI_ISL_14760600</a> | EPI2139845 | EPI2139846 | EPI2139844 | EPI2139848 | EPI2139841 | EPI2139847 | EPI2139843 | EPI2139842 | A/turkey/Italy/21VIR9869-4/2021  | *                                      | H5N1    |
| <a href="#">EPI_ISL_14760599</a> | EPI2139837 | EPI2139838 | EPI2139836 | EPI2139840 | EPI2139833 | EPI2139839 | EPI2139835 | EPI2139834 | A/turkey/Italy/21VIR9870-3/2021  | *                                      | H5N1    |
| <a href="#">EPI_ISL_14760596</a> | EPI2139813 | EPI2139814 | EPI2139812 | EPI2139816 | EPI2139809 | EPI2139815 | EPI2139811 | EPI2139810 | A/turkey/Italy/21VIR9766-3/2021  | *                                      | H5N1    |
| <a href="#">EPI_ISL_14760595</a> | EPI2139805 | EPI2139806 | EPI2139804 | EPI2139808 | EPI2139801 | EPI2139807 | EPI2139803 | EPI2139802 | A/turkey/Italy/21VIR9769-4/2021  | *                                      | H5N1    |
| <a href="#">EPI_ISL_14760594</a> | EPI2139797 | EPI2139798 | EPI2139796 | EPI2139800 | EPI2139793 | EPI2139799 | EPI2139795 | EPI2139794 | A/turkey/Italy/21VIR9697-3/2021  | *                                      | H5N1    |
| <a href="#">EPI_ISL_14760593</a> | EPI2139789 | EPI2139790 | EPI2139788 | EPI2139792 | EPI2139785 | EPI2139791 | EPI2139787 | EPI2139786 | A/turkey/Italy/21VIR9696-2/2021  | *                                      | H5N1    |
| <a href="#">EPI_ISL_14760592</a> | EPI2139781 | EPI2139782 | EPI2139780 | EPI2139784 | EPI2139777 | EPI2139783 | EPI2139779 | EPI2139778 | A/turkey/Italy/21VIR9693-3/2021  | *                                      | H5N1    |
| <a href="#">EPI_ISL_14760591</a> | EPI2139773 | EPI2139774 | EPI2139772 | EPI2139776 | EPI2139769 | EPI2139775 | EPI2139771 | EPI2139770 | A/turkey/Italy/21VIR9695-4/2021  | *                                      | H5N1    |
| <a href="#">EPI_ISL_14760590</a> | EPI2139765 | EPI2139766 | EPI2139764 | EPI2139768 | EPI2139761 | EPI2139767 | EPI2139763 | EPI2139762 | A/turkey/Italy/21VIR9692-16/2021 | *                                      | H5N1    |

| Isolate_Id                       | PB2        | PB1        | PA         | HA         | NP         | NA         | MP         | NS         | Isolate_Name                     | Present in the phylogenetic network | Subtype |
|----------------------------------|------------|------------|------------|------------|------------|------------|------------|------------|----------------------------------|-------------------------------------|---------|
| <a href="#">EPI_ISL_14760589</a> | EPI2139757 | EPI2139758 | EPI2139756 | EPI2139760 | EPI2139753 | EPI2139759 | EPI2139755 | EPI2139754 | A/turkey/Italy/21VIR9694-2/2021  | *                                   | H5N1    |
| <a href="#">EPI_ISL_14760588</a> | EPI2139749 | EPI2139750 | EPI2139748 | EPI2139752 | EPI2139745 | EPI2139751 | EPI2139747 | EPI2139746 | A/turkey/Italy/21VIR9647-2/2021  | *                                   | H5N1    |
| <a href="#">EPI_ISL_14760587</a> | EPI2139741 | EPI2139742 | EPI2139740 | EPI2139744 | EPI2139737 | EPI2139743 | EPI2139739 | EPI2139738 | A/turkey/Italy/21VIR9646-2/2021  | *                                   | H5N1    |
| <a href="#">EPI_ISL_14760586</a> | EPI2139733 | EPI2139734 | EPI2139732 | EPI2139736 | EPI2139729 | EPI2139735 | EPI2139731 | EPI2139730 | A/turkey/Italy/21VIR9650-2/2021  | *                                   | H5N1    |
| <a href="#">EPI_ISL_14760585</a> | EPI2139725 | EPI2139726 | EPI2139724 | EPI2139728 | EPI2139721 | EPI2139727 | EPI2139723 | EPI2139722 | A/turkey/Italy/21VIR9651-2/2021  | *                                   | H5N1    |
| <a href="#">EPI_ISL_14760584</a> | EPI2139717 | EPI2139718 | EPI2139716 | EPI2139720 | EPI2139713 | EPI2139719 | EPI2139715 | EPI2139714 | A/turkey/Italy/21VIR9648-2/2021  | *                                   | H5N1    |
| <a href="#">EPI_ISL_14760583</a> | EPI2139709 | EPI2139710 | EPI2139708 | EPI2139712 | EPI2139705 | EPI2139711 | EPI2139707 | EPI2139706 | A/turkey/Italy/21VIR9579-10/2021 | *                                   | H5N1    |
| <a href="#">EPI_ISL_14760581</a> | EPI2139693 | EPI2139694 | EPI2139692 | EPI2139696 | EPI2139689 | EPI2139695 | EPI2139691 | EPI2139690 | A/turkey/Italy/21VIR9645-2/2021  | *                                   | H5N1    |
| <a href="#">EPI_ISL_14760580</a> | EPI2139685 | EPI2139686 | EPI2139684 | EPI2139688 | EPI2139681 | EPI2139687 | EPI2139683 | EPI2139682 | A/turkey/Italy/21VIR9644-2/2021  | *                                   | H5N1    |
| <a href="#">EPI_ISL_14760579</a> | EPI2139677 | EPI2139678 | EPI2139676 | EPI2139680 | EPI2139673 | EPI2139679 | EPI2139675 | EPI2139674 | A/turkey/Italy/21VIR9643-2/2021  | *                                   | H5N1    |
| <a href="#">EPI_ISL_14760578</a> | EPI2139669 | EPI2139670 | EPI2139668 | EPI2139672 | EPI2139665 | EPI2139671 | EPI2139667 | EPI2139666 | A/turkey/Italy/21VIR9520-1/2021  | *                                   | H5N1    |
| <a href="#">EPI_ISL_14760577</a> | EPI2139661 | EPI2139662 | EPI2139660 | EPI2139664 | EPI2139657 | EPI2139663 | EPI2139659 | EPI2139658 | A/turkey/Italy/21VIR9519-1/2021  | *                                   | H5N1    |
| <a href="#">EPI_ISL_14760576</a> | EPI2139653 | EPI2139654 | EPI2139652 | EPI2139656 | EPI2139649 | EPI2139655 | EPI2139651 | EPI2139650 | A/turkey/Italy/21VIR9518-1/2021  | *                                   | H5N1    |
| <a href="#">EPI_ISL_14760574</a> | EPI2139637 | EPI2139638 | EPI2139636 | EPI2139640 | EPI2139633 | EPI2139639 | EPI2139635 | EPI2139634 | A/turkey/Italy/21VIR9608-2/2021  | *                                   | H5N1    |
| <a href="#">EPI_ISL_14760573</a> | EPI2139629 | EPI2139630 | EPI2139628 | EPI2139632 | EPI2139625 | EPI2139631 | EPI2139627 | EPI2139626 | A/turkey/Italy/21VIR9605-4/2021  | *                                   | H5N1    |
| <a href="#">EPI_ISL_14760572</a> | EPI2139621 | EPI2139622 | EPI2139620 | EPI2139624 | EPI2139617 | EPI2139623 | EPI2139619 | EPI2139618 | A/turkey/Italy/21VIR9609-2/2021  | *                                   | H5N1    |
| <a href="#">EPI_ISL_14760571</a> | EPI2139613 | EPI2139614 | EPI2139612 | EPI2139616 | EPI2139609 | EPI2139615 | EPI2139611 | EPI2139610 | A/turkey/Italy/21VIR9604-3/2021  | *                                   | H5N1    |
| <a href="#">EPI_ISL_14760570</a> | EPI2139605 | EPI2139606 | EPI2139604 | EPI2139608 | EPI2139601 | EPI2139607 | EPI2139603 | EPI2139602 | A/turkey/Italy/21VIR9606-2/2021  | *                                   | H5N1    |
| <a href="#">EPI_ISL_14760569</a> | EPI2139597 | EPI2139598 | EPI2139596 | EPI2139600 | EPI2139593 | EPI2139599 | EPI2139595 | EPI2139594 | A/turkey/Italy/21VIR9607-2/2021  | *                                   | H5N1    |
| <a href="#">EPI_ISL_14760565</a> | EPI2139565 | EPI2139566 | EPI2139564 | EPI2139568 | EPI2139561 | EPI2139567 | EPI2139563 | EPI2139562 | A/turkey/Italy/21VIR9475-1/2021  | *                                   | H5N1    |
| <a href="#">EPI_ISL_14760564</a> | EPI2139557 | EPI2139558 | EPI2139556 | EPI2139560 | EPI2139553 | EPI2139559 | EPI2139555 | EPI2139554 | A/turkey/Italy/21VIR9476-1/2021  | *                                   | H5N1    |
| <a href="#">EPI_ISL_14760563</a> | EPI2139549 | EPI2139550 | EPI2139548 | EPI2139552 | EPI2139545 | EPI2139551 | EPI2139547 | EPI2139546 | A/turkey/Italy/21VIR9426-3/2021  | *                                   | H5N1    |
| <a href="#">EPI_ISL_14760560</a> | EPI2139525 | EPI2139526 | EPI2139524 | EPI2139528 | EPI2139521 | EPI2139527 | EPI2139523 | EPI2139522 | A/turkey/Italy/21VIR9372-1/2021  | *                                   | H5N1    |
| <a href="#">EPI_ISL_14760556</a> | EPI2139493 | EPI2139494 | EPI2139492 | EPI2139496 | EPI2139489 | EPI2139495 | EPI2139491 | EPI2139490 | A/turkey/Italy/21VIR9215-1/2021  | *                                   | H5N1    |
| <a href="#">EPI_ISL_14760555</a> | EPI2139485 | EPI2139486 | EPI2139484 | EPI2139488 | EPI2139481 | EPI2139487 | EPI2139483 | EPI2139482 | A/turkey/Italy/21VIR9213-1/2021  | *                                   | H5N1    |
| <a href="#">EPI_ISL_14760554</a> | EPI2139477 | EPI2139478 | EPI2139476 | EPI2139480 | EPI2139473 | EPI2139479 | EPI2139475 | EPI2139474 | A/turkey/Italy/21VIR9217-1/2021  | *                                   | H5N1    |
| <a href="#">EPI_ISL_14760553</a> | EPI2139469 | EPI2139470 | EPI2139468 | EPI2139472 | EPI2139465 | EPI2139471 | EPI2139467 | EPI2139466 | A/turkey/Italy/21VIR9211-1/2021  | *                                   | H5N1    |
| <a href="#">EPI_ISL_14760551</a> | EPI2139453 | EPI2139454 | EPI2139452 | EPI2139456 | EPI2139449 | EPI2139455 | EPI2139451 | EPI2139450 | A/turkey/Italy/21VIR9209-1/2021  | *                                   | H5N1    |
| <a href="#">EPI_ISL_14760549</a> | EPI2139437 | EPI2139438 | EPI2139436 | EPI2139440 | EPI2139433 | EPI2139439 | EPI2139435 | EPI2139434 | A/turkey/Italy/21VIR9144-2/2021  | *                                   | H5N1    |
| <a href="#">EPI_ISL_14760547</a> | EPI2139421 | EPI2139422 | EPI2139420 | EPI2139424 | EPI2139417 | EPI2139423 | EPI2139419 | EPI2139418 | A/turkey/Italy/21VIR9073-3/2021  | *                                   | H5N1    |
| <a href="#">EPI_ISL_14760546</a> | EPI2139413 | EPI2139414 | EPI2139412 | EPI2139416 | EPI2139409 | EPI2139415 | EPI2139411 | EPI2139410 | A/turkey/Italy/21VIR8926-2/2021  |                                     | H5N1    |
| <a href="#">EPI_ISL_14760545</a> | EPI2139405 | EPI2139406 | EPI2139404 | EPI2139408 | EPI2139401 | EPI2139407 | EPI2139403 | EPI2139402 | A/turkey/Italy/21VIR8926-1/2021  | *                                   | H5N1    |
| <a href="#">EPI_ISL_14760544</a> | EPI2139397 | EPI2139398 | EPI2139396 | EPI2139400 | EPI2139393 | EPI2139399 | EPI2139395 | EPI2139394 | A/turkey/Italy/21VIR8925-6/2021  | *                                   | H5N1    |
| <a href="#">EPI_ISL_14760543</a> | EPI2139389 | EPI2139390 | EPI2139388 | EPI2139392 | EPI2139385 | EPI2139391 | EPI2139387 | EPI2139386 | A/turkey/Italy/21VIR8816-1/2021  | *                                   | H5N1    |
| <a href="#">EPI_ISL_14760542</a> | EPI2139381 | EPI2139382 | EPI2139380 | EPI2139384 | EPI2139377 | EPI2139383 | EPI2139379 | EPI2139378 | A/turkey/Italy/21VIR8728-1/2021  | *                                   | H5N1    |
| <a href="#">EPI_ISL_12028893</a> | EPI2017734 | EPI2017735 | EPI2017733 | EPI2017737 | EPI2017730 | EPI2017736 | EPI2017732 | EPI2017731 | A/turkey/Italy/21VIR11507/2021   | *                                   | H5N1    |
| <a href="#">EPI_ISL_11007548</a> | EPI1995225 | EPI1995226 | EPI1995224 | EPI1995228 | EPI1995221 | EPI1995227 | EPI1995223 | EPI1995222 | A/turkey/Italy/21VIR9520/2021    |                                     | H5N1    |

| Isolate_Id                       | PB2        | PB1        | PA         | HA         | NP         | NA         | MP         | NS         | Isolate_Name                          | Present in the phylogenetic network | Subtype |
|----------------------------------|------------|------------|------------|------------|------------|------------|------------|------------|---------------------------------------|-------------------------------------|---------|
| <a href="#">EPI_ISL_8882201</a>  | EPI1962054 | EPI1962055 | EPI1962053 | EPI1962057 | EPI1962050 | EPI1962056 | EPI1962052 | EPI1962051 | A/turkey/Italy/21VIR11803-1/2021      |                                     | H5N1    |
| <a href="#">EPI_ISL_8882187</a>  | EPI1962046 | EPI1962047 | EPI1962045 | EPI1962049 | EPI1962042 | EPI1962048 | EPI1962044 | EPI1962043 | A/turkey/Italy/21VIR11053-1/2021      |                                     | H5N1    |
| <a href="#">EPI_ISL_8882172</a>  | EPI1962030 | EPI1962031 | EPI1962029 | EPI1962033 | EPI1962026 | EPI1962032 | EPI1962028 | EPI1962027 | A/turkey/Italy/21VIR10851/2021        |                                     | H5N1    |
| <a href="#">EPI_ISL_8882171</a>  | EPI1962022 | EPI1962023 | EPI1962021 | EPI1962025 | EPI1962018 | EPI1962024 | EPI1962020 | EPI1962019 | A/turkey/Italy/21VIR11591-8/2021      |                                     | H5N1    |
| <a href="#">EPI_ISL_8882170</a>  | EPI1962014 | EPI1962015 | EPI1962013 | EPI1962017 | EPI1962010 | EPI1962016 | EPI1962012 | EPI1962011 | A/turkey/Italy/21VIR11887-3/2021      | *                                   | H5N1    |
| <a href="#">EPI_ISL_8882167</a>  | EPI1961990 | EPI1961991 | EPI1961989 | EPI1961993 | EPI1961986 | EPI1961992 | EPI1961988 | EPI1961987 | A/turkey/Italy/21VIR11804-1/2021      | *                                   | H5N1    |
| <a href="#">EPI_ISL_8882166</a>  | EPI1961982 | EPI1961983 | EPI1961981 | EPI1961985 | EPI1961978 | EPI1961984 | EPI1961980 | EPI1961979 | A/turkey/Italy/21VIR11586-2/2021      |                                     | H5N1    |
| <a href="#">EPI_ISL_14761272</a> | EPI2141634 | EPI2141635 | EPI2141633 | EPI2141638 | EPI2141630 | EPI2141636 | EPI2141632 | EPI2141631 | A/turkey/Italy/IZSLT_22VIR366-3/2022  |                                     | H5N1    |
| <a href="#">EPI_ISL_7733598</a>  | EPI1944293 | EPI1944294 | EPI1944292 | EPI1944296 | EPI1944289 | EPI1944295 | EPI1944291 | EPI1944290 | A/turkey/Italy/21VIR9816-1/2021       | *                                   | H5N1    |
| <a href="#">EPI_ISL_7733597</a>  | EPI1944285 | EPI1944286 | EPI1944284 | EPI1944288 | EPI1944281 | EPI1944287 | EPI1944283 | EPI1944282 | A/turkey/Italy/21VIR10340/2021        | *                                   | H5N1    |
| <a href="#">EPI_ISL_7733587</a>  | EPI1944261 | EPI1944262 | EPI1944260 | EPI1944264 | EPI1944257 | EPI1944263 | EPI1944259 | EPI1944258 | A/turkey/Italy/21VIR9618-7/2021       |                                     | H5N1    |
| <a href="#">EPI_ISL_7733643</a>  | EPI1944466 | EPI1944467 | EPI1944465 | EPI1944469 | EPI1944462 | EPI1944468 | EPI1944464 | EPI1944463 | A/turkey/Italy/21VIR9649-2/2021       | *                                   | H5N1    |
| <a href="#">EPI_ISL_7733638</a>  | EPI1944442 | EPI1944443 | EPI1944441 | EPI1944445 | EPI1944438 | EPI1944444 | EPI1944440 | EPI1944439 | A/turkey/Italy/21VIR9768-8/2021       | *                                   | H5N1    |
| <a href="#">EPI_ISL_7733635</a>  | EPI1944434 | EPI1944435 | EPI1944433 | EPI1944437 | EPI1944430 | EPI1944436 | EPI1944432 | EPI1944431 | A/turkey/Italy/21VIR9510-1/2021       | *                                   | H5N1    |
| <a href="#">EPI_ISL_7733633</a>  | EPI1944418 | EPI1944419 | EPI1944417 | EPI1944421 | EPI1944414 | EPI1944420 | EPI1944416 | EPI1944415 | A/turkey/Italy/21VIR9143-2/2021       | *                                   | H5N1    |
| <a href="#">EPI_ISL_7733632</a>  | EPI1944410 | EPI1944411 | EPI1944409 | EPI1944413 | EPI1944406 | EPI1944412 | EPI1944408 | EPI1944407 | A/turkey/Italy/21VIR9512-1/2021       | *                                   | H5N1    |
| <a href="#">EPI_ISL_7733629</a>  | EPI1944394 | EPI1944395 | EPI1944393 | EPI1944397 | EPI1944390 | EPI1944396 | EPI1944392 | EPI1944391 | A/turkey/Italy/21VIR9652-2/2021       | *                                   | H5N1    |
| <a href="#">EPI_ISL_7733628</a>  | EPI1944386 | EPI1944387 | EPI1944385 | EPI1944389 | EPI1944382 | EPI1944388 | EPI1944384 | EPI1944383 | A/turkey/Italy/21VIR10251/2021        |                                     | H5N1    |
| <a href="#">EPI_ISL_7733624</a>  | EPI1944378 | EPI1944379 | EPI1944377 | EPI1944381 | EPI1944374 | EPI1944380 | EPI1944376 | EPI1944375 | A/turkey/Italy/21VIR9767-3/2021       | *                                   | H5N1    |
| <a href="#">EPI_ISL_7733613</a>  | EPI1944354 | EPI1944355 | EPI1944353 | EPI1944357 | EPI1944350 | EPI1944356 | EPI1944352 | EPI1944351 | A/turkey/Italy/21VIR10456/2021        | *                                   | H5N1    |
| <a href="#">EPI_ISL_5524384</a>  | EPI1923189 | EPI1923190 | EPI1923191 | EPI1923192 | EPI1923193 | EPI1923194 | EPI1923195 | EPI1923196 | A/turkey/Italy/21VIR8585-1/2021       | *                                   | H5N1    |
| <a href="#">EPI_ISL_7733648</a>  | EPI1944498 | EPI1944499 | EPI1944497 | EPI1944501 | EPI1944494 | EPI1944500 | EPI1944496 | EPI1944495 | A/turkey/Italy/21VIR8817-1/2021       | *                                   | H5N1    |
| <a href="#">EPI_ISL_7733647</a>  | EPI1944490 | EPI1944491 | EPI1944489 | EPI1944493 | EPI1944486 | EPI1944492 | EPI1944488 | EPI1944487 | A/turkey/Italy/21VIR9210-1/2021       | *                                   | H5N1    |
| <a href="#">EPI_ISL_14761473</a> | EPI2141802 | EPI2141803 | EPI2141800 | EPI2141805 | EPI2141797 | EPI2141804 | EPI2141799 | EPI2141798 | A/peacock/Italy/22VIR1953-2/2022      |                                     | H5N1    |
| <a href="#">EPI_ISL_14761439</a> | EPI2141775 | EPI2141776 | EPI2141774 | EPI2141779 | EPI2141771 | EPI2141777 | EPI2141773 | EPI2141772 | A/laying_hen/Italy/22VIR1521-2/2022   |                                     | H5N1    |
| <a href="#">EPI_ISL_14761395</a> | EPI2141740 | EPI2141741 | EPI2141739 | EPI2141743 | EPI2141736 | EPI2141742 | EPI2141738 | EPI2141737 | A/herring_gull/Italy/22VIR1710-3/2022 |                                     | H5N1    |
| <a href="#">EPI_ISL_14761373</a> | EPI2141722 | EPI2141723 | EPI2141721 | EPI2141726 | EPI2141718 | EPI2141724 | EPI2141720 | EPI2141719 | A/buzzard/Italy/22VIR767-2/2022       |                                     | H5N1    |
| <a href="#">EPI_ISL_14761361</a> | EPI2141713 | EPI2141714 | EPI2141712 | EPI2141717 | EPI2141709 | EPI2141716 | EPI2141711 | EPI2141710 | A/buzzard/Italy/22VIR767-1/2022       |                                     | H5N1    |
| <a href="#">EPI_ISL_14761349</a> | EPI2141705 | EPI2141706 | EPI2141703 | EPI2141708 | EPI2141700 | EPI2141707 | EPI2141702 | EPI2141701 | A/hawk/Italy/22VIR428-7/2022          |                                     | H5N1    |
| <a href="#">EPI_ISL_14761338</a> | EPI2141696 | EPI2141697 | EPI2141695 | EPI2141699 | EPI2141691 | EPI2141698 | EPI2141694 | EPI2141693 | A/hawk/Italy/22VIR428-5/2022          |                                     | H5N1    |
| <a href="#">EPI_ISL_14761318</a> | EPI2141678 | EPI2141679 | EPI2141677 | EPI2141682 | EPI2141674 | EPI2141681 | EPI2141676 | EPI2141675 | A/laying_hen/Italy/22VIR204-1/2022    |                                     | H5N1    |
| <a href="#">EPI_ISL_14761302</a> | EPI2141661 | EPI2141662 | EPI2141660 | EPI2141664 | EPI2141656 | EPI2141663 | EPI2141658 | EPI2141657 | A/laying_hen/Italy/22VIR203-3/2022    |                                     | H5N1    |
| <a href="#">EPI_ISL_14761261</a> | EPI2141625 | EPI2141626 | EPI2141624 | EPI2141629 | EPI2141621 | EPI2141627 | EPI2141623 | EPI2141622 | A/laying_hen/Italy/22VIR48-1/2022     |                                     | H5N1    |
| <a href="#">EPI_ISL_14761176</a> | EPI2141537 | EPI2141538 | EPI2141536 | EPI2141540 | EPI2141533 | EPI2141539 | EPI2141535 | EPI2141534 | A/laying_hen/Italy/21VIR11801-7/2021  | *                                   | H5N1    |
| <a href="#">EPI_ISL_14761075</a> | EPI2141458 | EPI2141459 | EPI2141457 | EPI2141461 | EPI2141453 | EPI2141460 | EPI2141456 | EPI2141455 | A/laying_hen/Italy/21VIR11592-1/2021  |                                     | H5N1    |
| <a href="#">EPI_ISL_14761065</a> | EPI2141449 | EPI2141450 | EPI2141448 | EPI2141452 | EPI2141445 | EPI2141451 | EPI2141447 | EPI2141446 | A/laying_hen/Italy/21VIR11597-1/2021  | *                                   | H5N1    |
| <a href="#">EPI_ISL_14761052</a> | EPI2141440 | EPI2141441 | EPI2141439 | EPI2141444 | EPI2141436 | EPI2141442 | EPI2141438 | EPI2141437 | A/laying_hen/Italy/21VIR11595-5/2021  | *                                   | H5N1    |

| Isolate_Id                       | PB2        | PB1        | PA         | HA         | NP         | NA         | MP         | NS         | Isolate_Name                                | Present in the phylogenetic network | Subtype |
|----------------------------------|------------|------------|------------|------------|------------|------------|------------|------------|---------------------------------------------|-------------------------------------|---------|
| <a href="#">EPI_ISL_14760946</a> | EPI2141352 | EPI2141353 | EPI2141351 | EPI2141356 | EPI2141348 | EPI2141354 | EPI2141350 | EPI2141349 | A/laying_hen/Italy/21VIR11498-1/2021        |                                     | H5N1    |
| <a href="#">EPI_ISL_14760936</a> | EPI2141343 | EPI2141344 | EPI2141342 | EPI2141347 | EPI2141339 | EPI2141345 | EPI2141341 | EPI2141340 | A/laying_hen/Italy/21VIR11505-2/2021        |                                     | H5N1    |
| <a href="#">EPI_ISL_14760826</a> | EPI2141256 | EPI2141257 | EPI2141255 | EPI2141260 | EPI2141252 | EPI2141259 | EPI2141254 | EPI2141253 | A/laying_hen/Italy/21VIR11486/2021          |                                     | H5N1    |
| <a href="#">EPI_ISL_14760803</a> | EPI2141239 | EPI2141240 | EPI2141238 | EPI2141242 | EPI2141235 | EPI2141241 | EPI2141237 | EPI2141236 | A/laying_hen/Italy/21VIR11395-1/2021        |                                     | H5N1    |
| <a href="#">EPI_ISL_14760793</a> | EPI2141230 | EPI2141231 | EPI2141229 | EPI2141234 | EPI2141226 | EPI2141232 | EPI2141228 | EPI2141227 | A/laying_hen/Italy/21VIR11394-1/2021        |                                     | H5N1    |
| <a href="#">EPI_ISL_14760755</a> | EPI2141169 | EPI2141170 | EPI2141168 | EPI2141173 | EPI2141165 | EPI2141172 | EPI2141167 | EPI2141166 | A/laying_hen/Italy/21VIR11390-2/2021        |                                     | H5N1    |
| <a href="#">EPI_ISL_14760751</a> | EPI2141135 | EPI2141136 | EPI2141134 | EPI2141138 | EPI2141130 | EPI2141137 | EPI2141133 | EPI2141131 | A/laying_hen/Italy/21VIR11299/2021          | *                                   | H5N1    |
| <a href="#">EPI_ISL_14760750</a> | EPI2141126 | EPI2141127 | EPI2141125 | EPI2141129 | EPI2141122 | EPI2141128 | EPI2141124 | EPI2141123 | A/laying_hen/Italy/21VIR11253-1/2021        |                                     | H5N1    |
| <a href="#">EPI_ISL_14760735</a> | EPI2140996 | EPI2140997 | EPI2140995 | EPI2140999 | EPI2140991 | EPI2140998 | EPI2140994 | EPI2140992 | A/laying_hen/Italy/21VIR11300/2021          | *                                   | H5N1    |
| <a href="#">EPI_ISL_14760733</a> | EPI2140978 | EPI2140979 | EPI2140977 | EPI2140982 | EPI2140974 | EPI2140980 | EPI2140976 | EPI2140975 | A/laying_hen/Italy/21VIR11169/2021          | *                                   | H5N1    |
| <a href="#">EPI_ISL_14760732</a> | EPI2140969 | EPI2140971 | EPI2140968 | EPI2140973 | EPI2140965 | EPI2140972 | EPI2140967 | EPI2140966 | A/laying_hen/Italy/21VIR11168/2021          | *                                   | H5N1    |
| <a href="#">EPI_ISL_14760731</a> | EPI2140961 | EPI2140962 | EPI2140960 | EPI2140964 | EPI2140957 | EPI2140963 | EPI2140959 | EPI2140958 | A/laying_hen/Italy/21VIR11167/2021          | *                                   | H5N1    |
| <a href="#">EPI_ISL_14760639</a> | EPI2140160 | EPI2140161 | EPI2140159 | EPI2140164 | EPI2140156 | EPI2140162 | EPI2140158 | EPI2140157 | A/quail/Italy/21VIR10356/2021               | *                                   | H5N1    |
| <a href="#">EPI_ISL_14760575</a> | EPI2139645 | EPI2139646 | EPI2139644 | EPI2139648 | EPI2139641 | EPI2139647 | EPI2139643 | EPI2139642 | A/quail/Italy/21VIR9515-1/2021              | *                                   | H5N1    |
| <a href="#">EPI_ISL_14760561</a> | EPI2139533 | EPI2139534 | EPI2139532 | EPI2139536 | EPI2139529 | EPI2139535 | EPI2139531 | EPI2139530 | A/quail/Italy/21VIR9474-1/2021              | *                                   | H5N1    |
| <a href="#">EPI_ISL_8882218</a>  | EPI1962131 | EPI1962132 | EPI1962130 | EPI1962134 | EPI1962127 | EPI1962133 | EPI1962129 | EPI1962128 | A/seagull/Italy/21VIR11259-12/2021          |                                     | H5N1    |
| <a href="#">EPI_ISL_8882216</a>  | EPI1962118 | EPI1962119 | EPI1962117 | EPI1962121 | EPI1962114 | EPI1962120 | EPI1962116 | EPI1962115 | A/buzzard/Italy/21VIR11899-5/2021           |                                     | H5N1    |
| <a href="#">EPI_ISL_8882215</a>  | EPI1962110 | EPI1962111 | EPI1962109 | EPI1962113 | EPI1962106 | EPI1962112 | EPI1962108 | EPI1962107 | A/owl/Italy/21VIR11899-1/2021               |                                     | H5N1    |
| <a href="#">EPI_ISL_8882214</a>  | EPI1962102 | EPI1962103 | EPI1962101 | EPI1962105 | EPI1962098 | EPI1962104 | EPI1962100 | EPI1962099 | A/heron/Italy/21VIR10998-1/2021             |                                     | H5N1    |
| <a href="#">EPI_ISL_8882213</a>  | EPI1962094 | EPI1962095 | EPI1962093 | EPI1962097 | EPI1962090 | EPI1962096 | EPI1962092 | EPI1962091 | A/seagull/Italy/21VIR11259-10/2021          |                                     | H5N1    |
| <a href="#">EPI_ISL_8882212</a>  | EPI1962086 | EPI1962087 | EPI1962085 | EPI1962089 | EPI1962082 | EPI1962088 | EPI1962084 | EPI1962083 | A/cignus_olor/Italy/IZSLT_21VIR10529-1/2021 |                                     | H5N1    |
| <a href="#">EPI_ISL_8882210</a>  | EPI1962070 | EPI1962071 | EPI1962069 | EPI1962073 | EPI1962066 | EPI1962072 | EPI1962068 | EPI1962067 | A/seagull/Italy/21VIR10481-2/2021           | *                                   | H5N1    |
| <a href="#">EPI_ISL_8882209</a>  | EPI1962062 | EPI1962063 | EPI1962061 | EPI1962065 | EPI1962058 | EPI1962064 | EPI1962060 | EPI1962059 | A/little_owl/Italy/21VIR11382-1/2021        | *                                   | H5N1    |
| <a href="#">EPI_ISL_8882173</a>  | EPI1962038 | EPI1962039 | EPI1962037 | EPI1962041 | EPI1962034 | EPI1962040 | EPI1962036 | EPI1962035 | A/laying_hen/Italy/21VIR11502/2021          |                                     | H5N1    |
| <a href="#">EPI_ISL_14761208</a> | EPI2141563 | EPI2141565 | EPI2141562 | EPI2141567 | EPI2141559 | EPI2141566 | EPI2141561 | EPI2141560 | A/avian/Italy/21VIR11773-4/2021             |                                     | H5N1    |
| <a href="#">EPI_ISL_14760752</a> | EPI2141143 | EPI2141144 | EPI2141142 | EPI2141147 | EPI2141139 | EPI2141146 | EPI2141141 | EPI2141140 | A/avian/Italy/21VIR11301/2021               | *                                   | H5N1    |
| <a href="#">EPI_ISL_14760742</a> | EPI2141057 | EPI2141058 | EPI2141055 | EPI2141060 | EPI2141052 | EPI2141059 | EPI2141054 | EPI2141053 | A/avian/Italy/21VIR11236/2021               | *                                   | H5N1    |
| <a href="#">EPI_ISL_14760713</a> | EPI2140804 | EPI2140805 | EPI2140803 | EPI2140808 | EPI2140800 | EPI2140806 | EPI2140802 | EPI2140801 | A/avian/Italy/21VIR10913-3/2021             | *                                   | H5N1    |
| <a href="#">EPI_ISL_14760559</a> | EPI2139517 | EPI2139518 | EPI2139516 | EPI2139520 | EPI2139513 | EPI2139519 | EPI2139515 | EPI2139514 | A/avian/Italy/21VIR9425-2/2021              | *                                   | H5N1    |
| <a href="#">EPI_ISL_14761507</a> | EPI2141828 | EPI2141829 | EPI2141827 | EPI2141832 | EPI2141824 | EPI2141830 | EPI2141826 | EPI2141825 | A/broiler/Italy/22VIR1892-3/2022            |                                     | H5N1    |
| <a href="#">EPI_ISL_14761496</a> | EPI2141819 | EPI2141820 | EPI2141818 | EPI2141823 | EPI2141815 | EPI2141821 | EPI2141817 | EPI2141816 | A/chicken/Italy/22VIR1953-4/2022            |                                     | H5N1    |
| <a href="#">EPI_ISL_14761485</a> | EPI2141810 | EPI2141811 | EPI2141809 | EPI2141814 | EPI2141806 | EPI2141813 | EPI2141808 | EPI2141807 | A/chicken/Italy/22VIR1953-3/2022            |                                     | H5N1    |
| <a href="#">EPI_ISL_14761451</a> | EPI2141784 | EPI2141785 | EPI2141783 | EPI2141787 | EPI2141780 | EPI2141786 | EPI2141782 | EPI2141781 | A/chicken/Italy/22VIR1694-5/2022            |                                     | H5N1    |
| <a href="#">EPI_ISL_14761327</a> | EPI2141687 | EPI2141688 | EPI2141686 | EPI2141690 | EPI2141683 | EPI2141689 | EPI2141685 | EPI2141684 | A/broiler/Italy/22VIR278-3/2022             |                                     | H5N1    |
| <a href="#">EPI_ISL_14761312</a> | EPI2141669 | EPI2141670 | EPI2141668 | EPI2141673 | EPI2141665 | EPI2141672 | EPI2141667 | EPI2141666 | A/chicken/Italy/22VIR234-1/2022             |                                     | H5N1    |
| <a href="#">EPI_ISL_14761251</a> | EPI2141616 | EPI2141617 | EPI2141615 | EPI2141620 | EPI2141612 | EPI2141619 | EPI2141614 | EPI2141613 | A/broiler/Italy/22VIR54-1/2022              |                                     | H5N1    |
| <a href="#">EPI_ISL_14761250</a> | EPI2141608 | EPI2141609 | EPI2141606 | EPI2141611 | EPI2141603 | EPI2141610 | EPI2141605 | EPI2141604 | A/heron/Italy/22VIR1562/2022                |                                     | H5N1    |



| Isolate_Id                       | PB2        | PB1        | PA         | HA         | NP         | NA         | MP         | NS         | Isolate_Name                       | Present in the phylogenetic network | Subtype |
|----------------------------------|------------|------------|------------|------------|------------|------------|------------|------------|------------------------------------|-------------------------------------|---------|
| <a href="#">EPI_ISL_14761249</a> | EPI2141599 | EPI2141600 | EPI2141598 | EPI2141602 | EPI2141595 | EPI2141601 | EPI2141597 | EPI2141596 | A/broiler/Italy/21VIR11886-1/2021  | *                                   | H5N1    |
| <a href="#">EPI_ISL_14761243</a> | EPI2141590 | EPI2141591 | EPI2141589 | EPI2141594 | EPI2141586 | EPI2141592 | EPI2141588 | EPI2141587 | A/broiler/Italy/21VIR11847-1/2021  | *                                   | H5N1    |
| <a href="#">EPI_ISL_14761220</a> | EPI2141572 | EPI2141573 | EPI2141571 | EPI2141576 | EPI2141568 | EPI2141575 | EPI2141570 | EPI2141569 | A/chicken/Italy/21VIR11774-2/2021  |                                     | H5N1    |
| <a href="#">EPI_ISL_14761188</a> | EPI2141546 | EPI2141547 | EPI2141545 | EPI2141549 | EPI2141542 | EPI2141548 | EPI2141544 | EPI2141543 | A/broiler/Italy/21VIR11802-1/2021  | *                                   | H5N1    |
| <a href="#">EPI_ISL_14761165</a> | EPI2141528 | EPI2141529 | EPI2141527 | EPI2141532 | EPI2141524 | EPI2141530 | EPI2141526 | EPI2141525 | A/broiler/Italy/21VIR11800/2021    | *                                   | H5N1    |
| <a href="#">EPI_ISL_14761041</a> | EPI2141431 | EPI2141432 | EPI2141430 | EPI2141435 | EPI2141427 | EPI2141434 | EPI2141429 | EPI2141428 | A/broiler/Italy/21VIR11583-1/2021  | *                                   | H5N1    |
| <a href="#">EPI_ISL_14761020</a> | EPI2141414 | EPI2141415 | EPI2141413 | EPI2141417 | EPI2141410 | EPI2141416 | EPI2141412 | EPI2141411 | A/chicken/Italy/21VIR11572/2021    | *                                   | H5N1    |
| <a href="#">EPI_ISL_14761009</a> | EPI2141405 | EPI2141406 | EPI2141404 | EPI2141408 | EPI2141401 | EPI2141407 | EPI2141403 | EPI2141402 | A/chicken/Italy/21VIR11571/2021    | *                                   | H5N1    |
| <a href="#">EPI_ISL_14760880</a> | EPI2141300 | EPI2141301 | EPI2141299 | EPI2141303 | EPI2141296 | EPI2141302 | EPI2141298 | EPI2141297 | A/chicken/Italy/21VIR11508/2021    | *                                   | H5N1    |
| <a href="#">EPI_ISL_14760837</a> | EPI2141265 | EPI2141266 | EPI2141264 | EPI2141268 | EPI2141261 | EPI2141267 | EPI2141263 | EPI2141262 | A/chicken/Italy/21VIR11485/2021    | *                                   | H5N1    |
| <a href="#">EPI_ISL_14760774</a> | EPI2141213 | EPI2141214 | EPI2141212 | EPI2141216 | EPI2141209 | EPI2141215 | EPI2141211 | EPI2141210 | A/chicken/Italy/21VIR11385-1/2021  | *                                   | H5N1    |
| <a href="#">EPI_ISL_14760744</a> | EPI2141074 | EPI2141075 | EPI2141073 | EPI2141077 | EPI2141070 | EPI2141076 | EPI2141072 | EPI2141071 | A/chicken/Italy/21VIR11238/2021    |                                     | H5N1    |
| <a href="#">EPI_ISL_14760741</a> | EPI2141048 | EPI2141049 | EPI2141047 | EPI2141051 | EPI2141044 | EPI2141050 | EPI2141046 | EPI2141045 | A/chicken/Italy/21VIR11235/2021    |                                     | H5N1    |
| <a href="#">EPI_ISL_14760738</a> | EPI2141022 | EPI2141023 | EPI2141021 | EPI2141025 | EPI2141018 | EPI2141024 | EPI2141020 | EPI2141019 | A/chicken/Italy/21VIR11056-6/2021  |                                     | H5N1    |
| <a href="#">EPI_ISL_14760737</a> | EPI2141013 | EPI2141014 | EPI2141012 | EPI2141016 | EPI2141009 | EPI2141015 | EPI2141011 | EPI2141010 | A/chicken/Italy/21VIR11056-1/2021  |                                     | H5N1    |
| <a href="#">EPI_ISL_14760736</a> | EPI2141004 | EPI2141005 | EPI2141003 | EPI2141008 | EPI2141000 | EPI2141007 | EPI2141002 | EPI2141001 | A/chicken/Italy/21VIR11054-1/2021  |                                     | H5N1    |
| <a href="#">EPI_ISL_14760734</a> | EPI2140987 | EPI2140988 | EPI2140986 | EPI2140990 | EPI2140983 | EPI2140989 | EPI2140985 | EPI2140984 | A/chicken/Italy/21VIR11234/2021    | *                                   | H5N1    |
| <a href="#">EPI_ISL_14760727</a> | EPI2140926 | EPI2140927 | EPI2140925 | EPI2140929 | EPI2140922 | EPI2140928 | EPI2140924 | EPI2140923 | A/chicken/Italy/21VIR11055-1/2021  |                                     | H5N1    |
| <a href="#">EPI_ISL_14760723</a> | EPI2140891 | EPI2140892 | EPI2140890 | EPI2140895 | EPI2140887 | EPI2140893 | EPI2140889 | EPI2140888 | A/chicken/Italy/21VIR10997-1/2021  | *                                   | H5N1    |
| <a href="#">EPI_ISL_14760722</a> | EPI2140883 | EPI2140884 | EPI2140881 | EPI2140886 | EPI2140878 | EPI2140885 | EPI2140880 | EPI2140879 | A/chicken/Italy/21VIR10999-1/2021  | *                                   | H5N1    |
| <a href="#">EPI_ISL_14760721</a> | EPI2140874 | EPI2140875 | EPI2140873 | EPI2140877 | EPI2140870 | EPI2140876 | EPI2140872 | EPI2140871 | A/chicken/Italy/21VIR10995-1/2021  |                                     | H5N1    |
| <a href="#">EPI_ISL_14760719</a> | EPI2140856 | EPI2140858 | EPI2140855 | EPI2140860 | EPI2140852 | EPI2140859 | EPI2140854 | EPI2140853 | A/chicken/Italy/21VIR11075-2/2021  | *                                   | H5N1    |
| <a href="#">EPI_ISL_14760718</a> | EPI2140848 | EPI2140849 | EPI2140847 | EPI2140851 | EPI2140843 | EPI2140850 | EPI2140846 | EPI2140845 | A/chicken/Italy/21VIR11073-1/2021  | *                                   | H5N1    |
| <a href="#">EPI_ISL_14760717</a> | EPI2140839 | EPI2140840 | EPI2140838 | EPI2140842 | EPI2140835 | EPI2140841 | EPI2140837 | EPI2140836 | A/chicken/Italy/21VIR11078-10/2021 | *                                   | H5N1    |
| <a href="#">EPI_ISL_14760716</a> | EPI2140830 | EPI2140831 | EPI2140829 | EPI2140834 | EPI2140826 | EPI2140833 | EPI2140828 | EPI2140827 | A/chicken/Italy/21VIR11079-11/2021 | *                                   | H5N1    |
| <a href="#">EPI_ISL_14760715</a> | EPI2140822 | EPI2140823 | EPI2140821 | EPI2140825 | EPI2140817 | EPI2140824 | EPI2140819 | EPI2140818 | A/chicken/Italy/21VIR11076-1/2021  | *                                   | H5N1    |
| <a href="#">EPI_ISL_14760714</a> | EPI2140813 | EPI2140814 | EPI2140812 | EPI2140816 | EPI2140809 | EPI2140815 | EPI2140811 | EPI2140810 | A/chicken/Italy/21VIR10987-1/2021  | *                                   | H5N1    |
| <a href="#">EPI_ISL_14760712</a> | EPI2140795 | EPI2140797 | EPI2140794 | EPI2140799 | EPI2140791 | EPI2140798 | EPI2140793 | EPI2140792 | A/chicken/Italy/21VIR11071-2/2021  | *                                   | H5N1    |
| <a href="#">EPI_ISL_14760711</a> | EPI2140787 | EPI2140788 | EPI2140786 | EPI2140790 | EPI2140783 | EPI2140789 | EPI2140785 | EPI2140784 | A/chicken/Italy/21VIR11074-1/2021  | *                                   | H5N1    |
| <a href="#">EPI_ISL_14760710</a> | EPI2140778 | EPI2140779 | EPI2140777 | EPI2140782 | EPI2140774 | EPI2140780 | EPI2140776 | EPI2140775 | A/chicken/Italy/21VIR11072-1/2021  | *                                   | H5N1    |
| <a href="#">EPI_ISL_14760709</a> | EPI2140769 | EPI2140770 | EPI2140768 | EPI2140773 | EPI2140765 | EPI2140772 | EPI2140767 | EPI2140766 | A/chicken/Italy/21VIR10989/2021    | *                                   | H5N1    |
| <a href="#">EPI_ISL_14760707</a> | EPI2140752 | EPI2140753 | EPI2140751 | EPI2140755 | EPI2140748 | EPI2140754 | EPI2140750 | EPI2140749 | A/chicken/Italy/21VIR10969-3/2021  |                                     | H5N1    |
| <a href="#">EPI_ISL_14760706</a> | EPI2140743 | EPI2140744 | EPI2140742 | EPI2140747 | EPI2140739 | EPI2140745 | EPI2140741 | EPI2140740 | A/chicken/Italy/21VIR10972-3/2021  |                                     | H5N1    |
| <a href="#">EPI_ISL_14760705</a> | EPI2140735 | EPI2140736 | EPI2140734 | EPI2140738 | EPI2140730 | EPI2140737 | EPI2140733 | EPI2140731 | A/chicken/Italy/21VIR10973-4/2021  |                                     | H5N1    |
| <a href="#">EPI_ISL_14760704</a> | EPI2140726 | EPI2140727 | EPI2140725 | EPI2140729 | EPI2140722 | EPI2140728 | EPI2140724 | EPI2140723 | A/chicken/Italy/21VIR10971-3/2021  |                                     | H5N1    |
| <a href="#">EPI_ISL_14760701</a> | EPI2140700 | EPI2140701 | EPI2140699 | EPI2140703 | EPI2140696 | EPI2140702 | EPI2140698 | EPI2140697 | A/chicken/Italy/21VIR10843-1/2021  |                                     | H5N1    |
| <a href="#">EPI_ISL_14760698</a> | EPI2140674 | EPI2140675 | EPI2140673 | EPI2140677 | EPI2140670 | EPI2140676 | EPI2140672 | EPI2140671 | A/chicken/Italy/21VIR10928/2021    | *                                   | H5N1    |

| Isolate_Id                       | PB2        | PB1        | PA         | HA         | NP         | NA         | MP         | NS         | Isolate_Name                       | Present in the phylogenetic network | Subtype |
|----------------------------------|------------|------------|------------|------------|------------|------------|------------|------------|------------------------------------|-------------------------------------|---------|
| <a href="#">EPI_ISL_14760696</a> | EPI2140656 | EPI2140657 | EPI2140655 | EPI2140660 | EPI2140652 | EPI2140658 | EPI2140654 | EPI2140653 | A/chicken/Italy/21VIR10812-11/2021 |                                     | H5N1    |
| <a href="#">EPI_ISL_14760695</a> | EPI2140647 | EPI2140648 | EPI2140646 | EPI2140651 | EPI2140643 | EPI2140650 | EPI2140645 | EPI2140644 | A/chicken/Italy/21VIR10811-28/2021 |                                     | H5N1    |
| <a href="#">EPI_ISL_14760692</a> | EPI2140621 | EPI2140622 | EPI2140620 | EPI2140624 | EPI2140616 | EPI2140623 | EPI2140619 | EPI2140618 | A/chicken/Italy/21VIR10808-1/2021  |                                     | H5N1    |
| <a href="#">EPI_ISL_14760691</a> | EPI2140612 | EPI2140613 | EPI2140611 | EPI2140615 | EPI2140608 | EPI2140614 | EPI2140610 | EPI2140609 | A/chicken/Italy/21VIR10814-1/2021  |                                     | H5N1    |
| <a href="#">EPI_ISL_14760688</a> | EPI2140585 | EPI2140586 | EPI2140584 | EPI2140589 | EPI2140581 | EPI2140588 | EPI2140583 | EPI2140582 | A/chicken/Italy/21VIR10696-7/2021  | *                                   | H5N1    |
| <a href="#">EPI_ISL_14760681</a> | EPI2140523 | EPI2140524 | EPI2140522 | EPI2140527 | EPI2140519 | EPI2140526 | EPI2140521 | EPI2140520 | A/chicken/Italy/21VIR10853/2021    |                                     | H5N1    |
| <a href="#">EPI_ISL_14760678</a> | EPI2140497 | EPI2140498 | EPI2140496 | EPI2140500 | EPI2140493 | EPI2140499 | EPI2140495 | EPI2140494 | A/chicken/Italy/21VIR10637-2/2021  | *                                   | H5N1    |
| <a href="#">EPI_ISL_14760677</a> | EPI2140488 | EPI2140489 | EPI2140487 | EPI2140491 | EPI2140484 | EPI2140490 | EPI2140486 | EPI2140485 | A/chicken/Italy/21VIR10635-1/2021  |                                     | H5N1    |
| <a href="#">EPI_ISL_14760676</a> | EPI2140479 | EPI2140480 | EPI2140478 | EPI2140483 | EPI2140475 | EPI2140481 | EPI2140477 | EPI2140476 | A/chicken/Italy/21VIR10634-1/2021  |                                     | H5N1    |
| <a href="#">EPI_ISL_14760675</a> | EPI2140470 | EPI2140471 | EPI2140469 | EPI2140474 | EPI2140466 | EPI2140472 | EPI2140468 | EPI2140467 | A/chicken/Italy/21VIR10723-1/2021  | *                                   | H5N1    |
| <a href="#">EPI_ISL_14760674</a> | EPI2140461 | EPI2140463 | EPI2140460 | EPI2140465 | EPI2140457 | EPI2140464 | EPI2140459 | EPI2140458 | A/chicken/Italy/21VIR10724-13/2021 | *                                   | H5N1    |
| <a href="#">EPI_ISL_14760673</a> | EPI2140453 | EPI2140454 | EPI2140451 | EPI2140456 | EPI2140448 | EPI2140455 | EPI2140450 | EPI2140449 | A/chicken/Italy/21VIR10620-1/2021  | *                                   | H5N1    |
| <a href="#">EPI_ISL_14760672</a> | EPI2140444 | EPI2140445 | EPI2140443 | EPI2140447 | EPI2140439 | EPI2140446 | EPI2140441 | EPI2140440 | A/chicken/Italy/21VIR10619-1/2021  | *                                   | H5N1    |
| <a href="#">EPI_ISL_14760671</a> | EPI2140435 | EPI2140436 | EPI2140434 | EPI2140438 | EPI2140430 | EPI2140437 | EPI2140433 | EPI2140432 | A/chicken/Italy/21VIR10618-19/2021 | *                                   | H5N1    |
| <a href="#">EPI_ISL_14760670</a> | EPI2140426 | EPI2140427 | EPI2140425 | EPI2140429 | EPI2140422 | EPI2140428 | EPI2140424 | EPI2140423 | A/chicken/Italy/21VIR10616-1/2021  | *                                   | H5N1    |
| <a href="#">EPI_ISL_14760666</a> | EPI2140390 | EPI2140392 | EPI2140389 | EPI2140394 | EPI2140386 | EPI2140393 | EPI2140388 | EPI2140387 | A/chicken/Italy/21VIR10522-13/2021 | *                                   | H5N1    |
| <a href="#">EPI_ISL_14760665</a> | EPI2140382 | EPI2140383 | EPI2140381 | EPI2140385 | EPI2140377 | EPI2140384 | EPI2140379 | EPI2140378 | A/chicken/Italy/21VIR10463-1/2021  | *                                   | H5N1    |
| <a href="#">EPI_ISL_14760661</a> | EPI2140346 | EPI2140347 | EPI2140345 | EPI2140350 | EPI2140342 | EPI2140348 | EPI2140344 | EPI2140343 | A/chicken/Italy/21VIR10386/2021    | *                                   | H5N1    |
| <a href="#">EPI_ISL_14760659</a> | EPI2140328 | EPI2140330 | EPI2140327 | EPI2140332 | EPI2140324 | EPI2140331 | EPI2140326 | EPI2140325 | A/chicken/Italy/21VIR10469/2021    | *                                   | H5N1    |
| <a href="#">EPI_ISL_14760658</a> | EPI2140320 | EPI2140321 | EPI2140319 | EPI2140323 | EPI2140315 | EPI2140322 | EPI2140317 | EPI2140316 | A/chicken/Italy/21VIR10385/2021    | *                                   | H5N1    |
| <a href="#">EPI_ISL_14760655</a> | EPI2140302 | EPI2140303 | EPI2140301 | EPI2140305 | EPI2140298 | EPI2140304 | EPI2140300 | EPI2140299 | A/chicken/Italy/21VIR10387/2021    | *                                   | H5N1    |
| <a href="#">EPI_ISL_14760654</a> | EPI2140293 | EPI2140294 | EPI2140292 | EPI2140297 | EPI2140289 | EPI2140295 | EPI2140291 | EPI2140290 | A/chicken/Italy/21VIR10470/2021    | *                                   | H5N1    |
| <a href="#">EPI_ISL_14760651</a> | EPI2140266 | EPI2140268 | EPI2140265 | EPI2140270 | EPI2140262 | EPI2140269 | EPI2140264 | EPI2140263 | A/chicken/Italy/21VIR10394/2021    | *                                   | H5N1    |
| <a href="#">EPI_ISL_14760648</a> | EPI2140240 | EPI2140241 | EPI2140239 | EPI2140243 | EPI2140236 | EPI2140242 | EPI2140238 | EPI2140237 | A/chicken/Italy/21VIR10382/2021    | *                                   | H5N1    |
| <a href="#">EPI_ISL_14760646</a> | EPI2140222 | EPI2140223 | EPI2140221 | EPI2140226 | EPI2140218 | EPI2140224 | EPI2140220 | EPI2140219 | A/chicken/Italy/21VIR10265/2021    | *                                   | H5N1    |
| <a href="#">EPI_ISL_14760645</a> | EPI2140213 | EPI2140214 | EPI2140212 | EPI2140217 | EPI2140209 | EPI2140215 | EPI2140211 | EPI2140210 | A/chicken/Italy/21VIR10264/2021    | *                                   | H5N1    |
| <a href="#">EPI_ISL_14760644</a> | EPI2140204 | EPI2140205 | EPI2140203 | EPI2140208 | EPI2140200 | EPI2140207 | EPI2140202 | EPI2140201 | A/chicken/Italy/21VIR10271/2021    | *                                   | H5N1    |
| <a href="#">EPI_ISL_14760643</a> | EPI2140195 | EPI2140197 | EPI2140194 | EPI2140199 | EPI2140191 | EPI2140198 | EPI2140193 | EPI2140192 | A/chicken/Italy/21VIR10263/2021    | *                                   | H5N1    |
| <a href="#">EPI_ISL_14760642</a> | EPI2140187 | EPI2140188 | EPI2140185 | EPI2140190 | EPI2140182 | EPI2140189 | EPI2140184 | EPI2140183 | A/chicken/Italy/21VIR10262/2021    | *                                   | H5N1    |
| <a href="#">EPI_ISL_14760641</a> | EPI2140178 | EPI2140179 | EPI2140177 | EPI2140181 | EPI2140174 | EPI2140180 | EPI2140176 | EPI2140175 | A/chicken/Italy/21VIR10357/2021    | *                                   | H5N1    |
| <a href="#">EPI_ISL_14760640</a> | EPI2140169 | EPI2140170 | EPI2140168 | EPI2140172 | EPI2140165 | EPI2140171 | EPI2140167 | EPI2140166 | A/chicken/Italy/21VIR10358/2021    | *                                   | H5N1    |
| <a href="#">EPI_ISL_14760636</a> | EPI2140136 | EPI2140137 | EPI2140135 | EPI2140139 | EPI2140132 | EPI2140138 | EPI2140134 | EPI2140133 | A/chicken/Italy/21VIR10146/2021    | *                                   | H5N1    |
| <a href="#">EPI_ISL_14760635</a> | EPI2140128 | EPI2140129 | EPI2140127 | EPI2140131 | EPI2140124 | EPI2140130 | EPI2140126 | EPI2140125 | A/chicken/Italy/21VIR10252/2021    | *                                   | H5N1    |
| <a href="#">EPI_ISL_14760629</a> | EPI2140080 | EPI2140081 | EPI2140079 | EPI2140083 | EPI2140076 | EPI2140082 | EPI2140078 | EPI2140077 | A/chicken/Italy/21VIR10094/2021    | *                                   | H5N1    |
| <a href="#">EPI_ISL_14760626</a> | EPI2140054 | EPI2140055 | EPI2140053 | EPI2140057 | EPI2140050 | EPI2140056 | EPI2140052 | EPI2140051 | A/chicken/Italy/21VIR10093/2021    | *                                   | H5N1    |
| <a href="#">EPI_ISL_14760625</a> | EPI2140045 | EPI2140047 | EPI2140043 | EPI2140049 | EPI2140040 | EPI2140048 | EPI2140042 | EPI2140041 | A/chicken/Italy/21VIR10096/2021    | *                                   | H5N1    |
| <a href="#">EPI_ISL_14760624</a> | EPI2140036 | EPI2140037 | EPI2140035 | EPI2140039 | EPI2140032 | EPI2140038 | EPI2140034 | EPI2140033 | A/chicken/Italy/21VIR9940-5/2021   | *                                   | H5N1    |



| Isolate_Id                       | PB2        | PB1        | PA         | HA         | NP         | NA         | MP         | NS         | Isolate_Name                                  | Present in the phylogenetic network | Subtype |
|----------------------------------|------------|------------|------------|------------|------------|------------|------------|------------|-----------------------------------------------|-------------------------------------|---------|
| <a href="#">EPI_ISL_14760622</a> | EPI2140020 | EPI2140021 | EPI2140019 | EPI2140023 | EPI2140016 | EPI2140022 | EPI2140018 | EPI2140017 | A/chicken/Italy/21VIR9944-2/2021              | *                                   | H5N1    |
| <a href="#">EPI_ISL_14760620</a> | EPI2140004 | EPI2140005 | EPI2140003 | EPI2140007 | EPI2140000 | EPI2140006 | EPI2140002 | EPI2140001 | A/chicken/Italy/21VIR9998/2021                | *                                   | H5N1    |
| <a href="#">EPI_ISL_14760616</a> | EPI2139972 | EPI2139973 | EPI2139971 | EPI2139975 | EPI2139968 | EPI2139974 | EPI2139970 | EPI2139969 | A/chicken/Italy/21VIR10000/2021               | *                                   | H5N1    |
| <a href="#">EPI_ISL_14760612</a> | EPI2139940 | EPI2139941 | EPI2139939 | EPI2139943 | EPI2139936 | EPI2139942 | EPI2139938 | EPI2139937 | A/chicken/Italy/21VIR9858-3/2021              | *                                   | H5N1    |
| <a href="#">EPI_ISL_14760605</a> | EPI2139885 | EPI2139886 | EPI2139884 | EPI2139888 | EPI2139881 | EPI2139887 | EPI2139883 | EPI2139882 | A/chicken/Italy/21VIR9904-18/2021             |                                     | H5N1    |
| <a href="#">EPI_ISL_14760604</a> | EPI2139877 | EPI2139878 | EPI2139876 | EPI2139880 | EPI2139873 | EPI2139879 | EPI2139875 | EPI2139874 | A/chicken/Italy/21VIR9904-17/2021             |                                     | H5N1    |
| <a href="#">EPI_ISL_14760603</a> | EPI2139869 | EPI2139870 | EPI2139868 | EPI2139872 | EPI2139865 | EPI2139871 | EPI2139867 | EPI2139866 | A/chicken/Italy/21VIR9904-16/2021             | *                                   | H5N1    |
| <a href="#">EPI_ISL_14760602</a> | EPI2139861 | EPI2139862 | EPI2139860 | EPI2139864 | EPI2139857 | EPI2139863 | EPI2139859 | EPI2139858 | A/chicken/Italy/21VIR9830-27/2021             | *                                   | H5N1    |
| <a href="#">EPI_ISL_14760598</a> | EPI2139829 | EPI2139830 | EPI2139828 | EPI2139832 | EPI2139825 | EPI2139831 | EPI2139827 | EPI2139826 | A/chicken/Italy/21VIR9902-2/2021              | *                                   | H5N1    |
| <a href="#">EPI_ISL_14760597</a> | EPI2139821 | EPI2139822 | EPI2139820 | EPI2139824 | EPI2139817 | EPI2139823 | EPI2139819 | EPI2139818 | A/chicken/Italy/21VIR9868-8/2021              | *                                   | H5N1    |
| <a href="#">EPI_ISL_14760582</a> | EPI2139701 | EPI2139702 | EPI2139700 | EPI2139704 | EPI2139697 | EPI2139703 | EPI2139699 | EPI2139698 | A/chicken/Italy/21VIR9580-23/2021             |                                     | H5N1    |
| <a href="#">EPI_ISL_14760568</a> | EPI2139589 | EPI2139590 | EPI2139588 | EPI2139592 | EPI2139585 | EPI2139591 | EPI2139587 | EPI2139586 | A/chicken/Italy/21VIR9508-3/2021              | *                                   | H5N1    |
| <a href="#">EPI_ISL_14760567</a> | EPI2139581 | EPI2139582 | EPI2139580 | EPI2139584 | EPI2139577 | EPI2139583 | EPI2139579 | EPI2139578 | A/chicken/Italy/21VIR9507-7/2021              | *                                   | H5N1    |
| <a href="#">EPI_ISL_14760566</a> | EPI2139573 | EPI2139574 | EPI2139572 | EPI2139576 | EPI2139569 | EPI2139575 | EPI2139571 | EPI2139570 | A/chicken/Italy/21VIR9509-1/2021              | *                                   | H5N1    |
| <a href="#">EPI_ISL_14760558</a> | EPI2139509 | EPI2139510 | EPI2139508 | EPI2139512 | EPI2139505 | EPI2139511 | EPI2139507 | EPI2139506 | A/chicken/Italy/21VIR9371-1/2021              | *                                   | H5N1    |
| <a href="#">EPI_ISL_14760557</a> | EPI2139501 | EPI2139502 | EPI2139500 | EPI2139504 | EPI2139497 | EPI2139503 | EPI2139499 | EPI2139498 | A/chicken/Italy/21VIR9219-6/2021              | *                                   | H5N1    |
| <a href="#">EPI_ISL_14760552</a> | EPI2139461 | EPI2139462 | EPI2139460 | EPI2139464 | EPI2139457 | EPI2139463 | EPI2139459 | EPI2139458 | A/chicken/Italy/21VIR9212-1/2021              | *                                   | H5N1    |
| <a href="#">EPI_ISL_14760550</a> | EPI2139445 | EPI2139446 | EPI2139444 | EPI2139448 | EPI2139441 | EPI2139447 | EPI2139443 | EPI2139442 | A/chicken/Italy/21VIR9133-21/2021             |                                     | H5N1    |
| <a href="#">EPI_ISL_14760548</a> | EPI2139429 | EPI2139430 | EPI2139428 | EPI2139432 | EPI2139425 | EPI2139431 | EPI2139427 | EPI2139426 | A/chicken/Italy/21VIR9074-10/2021             | *                                   | H5N1    |
| <a href="#">EPI_ISL_8882169</a>  | EPI1962006 | EPI1962007 | EPI1962005 | EPI1962009 | EPI1962002 | EPI1962008 | EPI1962004 | EPI1962003 | A/chicken/Italy/21VIR10573-1/2021             | *                                   | H5N1    |
| <a href="#">EPI_ISL_8882168</a>  | EPI1961998 | EPI1961999 | EPI1961997 | EPI1962001 | EPI1961994 | EPI1962000 | EPI1961996 | EPI1961995 | A/chicken/Italy/21VIR10850/2021               | *                                   | H5N1    |
| <a href="#">EPI_ISL_14761519</a> | EPI2141837 | EPI2141838 | EPI2141836 | EPI2141840 | EPI2141833 | EPI2141839 | EPI2141835 | EPI2141834 | A/chicken/Italy/IZSLT22VIR2562-1/2022         |                                     | H5N1    |
| <a href="#">EPI_ISL_7733603</a>  | EPI1944309 | EPI1944310 | EPI1944308 | EPI1944312 | EPI1944305 | EPI1944311 | EPI1944307 | EPI1944306 | A/chicken/Italy/21VIR9951-25/2021             | *                                   | H5N1    |
| <a href="#">EPI_ISL_7733599</a>  | EPI1944301 | EPI1944302 | EPI1944300 | EPI1944304 | EPI1944297 | EPI1944303 | EPI1944299 | EPI1944298 | A/chicken/Italy/21VIR10389/2021               |                                     | H5N1    |
| <a href="#">EPI_ISL_7733595</a>  | EPI1944277 | EPI1944278 | EPI1944276 | EPI1944280 | EPI1944273 | EPI1944279 | EPI1944275 | EPI1944274 | A/chicken/Italy/21VIR10239/2021               | *                                   | H5N1    |
| <a href="#">EPI_ISL_7733582</a>  | EPI1944237 | EPI1944238 | EPI1944236 | EPI1944240 | EPI1944233 | EPI1944239 | EPI1944235 | EPI1944234 | A/chicken/Italy/21VIR10388/2021               |                                     | H5N1    |
| <a href="#">EPI_ISL_7733641</a>  | EPI1944450 | EPI1944451 | EPI1944449 | EPI1944453 | EPI1944446 | EPI1944452 | EPI1944448 | EPI1944447 | A/chicken/Italy/21VIR10352/2021               |                                     | H5N1    |
| <a href="#">EPI_ISL_7733634</a>  | EPI1944426 | EPI1944427 | EPI1944425 | EPI1944429 | EPI1944422 | EPI1944428 | EPI1944424 | EPI1944423 | A/chicken/Italy/21VIR9765-12/2021             | *                                   | H5N1    |
| <a href="#">EPI_ISL_7733630</a>  | EPI1944402 | EPI1944403 | EPI1944401 | EPI1944405 | EPI1944398 | EPI1944404 | EPI1944400 | EPI1944399 | A/chicken/Italy/21VIR9691-2/2021              | *                                   | H5N1    |
| <a href="#">EPI_ISL_7733617</a>  | EPI1944362 | EPI1944363 | EPI1944361 | EPI1944365 | EPI1944358 | EPI1944364 | EPI1944360 | EPI1944359 | A/chicken/Italy/21VIR9133-20/2021             | *                                   | H5N1    |
| <a href="#">EPI_ISL_7733609</a>  | EPI1944325 | EPI1944326 | EPI1944324 | EPI1944328 | EPI1944321 | EPI1944327 | EPI1944323 | EPI1944322 | A/chicken/Italy/21VIR9580-22/2021             | *                                   | H5N1    |
| <a href="#">EPI_ISL_7733607</a>  | EPI1944317 | EPI1944318 | EPI1944316 | EPI1944320 | EPI1944313 | EPI1944319 | EPI1944315 | EPI1944314 | A/chicken/Italy/21VIR10384/2021               | *                                   | H5N1    |
| <a href="#">EPI_ISL_7733644</a>  | EPI1944474 | EPI1944475 | EPI1944473 | EPI1944477 | EPI1944470 | EPI1944476 | EPI1944472 | EPI1944471 | A/chicken/Italy/IZSLT-122448_21VIR9218-1/2021 |                                     | H5N1    |
| <a href="#">EPI_ISL_14761417</a> | EPI2141758 | EPI2141759 | EPI2141756 | EPI2141761 | EPI2141753 | EPI2141760 | EPI2141755 | EPI2141754 | A/duck/Italy/22VIR1295-1/2022                 |                                     | H5N1    |
| <a href="#">EPI_ISL_14761407</a> | EPI2141749 | EPI2141750 | EPI2141748 | EPI2141752 | EPI2141744 | EPI2141751 | EPI2141747 | EPI2141746 | A/duck/Italy/22VIR1294-1/2022                 |                                     | H5N1    |
| <a href="#">EPI_ISL_14760988</a> | EPI2141387 | EPI2141388 | EPI2141386 | EPI2141391 | EPI2141383 | EPI2141390 | EPI2141385 | EPI2141384 | A/duck/Italy/21VIR11501/2021                  |                                     | H5N1    |
| <a href="#">EPI_ISL_14760693</a> | EPI2140630 | EPI2140631 | EPI2140629 | EPI2140633 | EPI2140625 | EPI2140632 | EPI2140627 | EPI2140626 | A/duck/Italy/21VIR10809-1/2021                |                                     | H5N1    |

| Isolate_Id                       | PB2        | PB1        | PA         | HA         | NP         | NA         | MP         | NS         | Isolate_Name                             | Present in the phylogenetic network | Subtype |
|----------------------------------|------------|------------|------------|------------|------------|------------|------------|------------|------------------------------------------|-------------------------------------|---------|
| <a href="#">EPI_ISL_14760662</a> | EPI2140355 | EPI2140356 | EPI2140354 | EPI2140359 | EPI2140351 | EPI2140357 | EPI2140353 | EPI2140352 | A/duck/Italy/21VIR10523-1/2021           |                                     | H5N1    |
| <a href="#">EPI_ISL_14760608</a> | EPI2139909 | EPI2139910 | EPI2139908 | EPI2139912 | EPI2139905 | EPI2139911 | EPI2139907 | EPI2139906 | A/duck/Italy/21VIR9836-15/2021           | *                                   | H5N1    |
| <a href="#">EPI_ISL_14760562</a> | EPI2139541 | EPI2139542 | EPI2139540 | EPI2139544 | EPI2139537 | EPI2139543 | EPI2139539 | EPI2139538 | A/duck/Italy/21VIR9373-2/2021            | *                                   | H5N1    |
| <a href="#">EPI_ISL_7733584</a>  | EPI1944245 | EPI1944246 | EPI1944244 | EPI1944248 | EPI1944241 | EPI1944247 | EPI1944243 | EPI1944242 | A/duck/Italy/21VIR10447/2021             |                                     | H5N1    |
| <a href="#">EPI_ISL_7733591</a>  | EPI1944269 | EPI1944270 | EPI1944268 | EPI1944272 | EPI1944265 | EPI1944271 | EPI1944267 | EPI1944266 | A/mallard/Italy/21VIR8919-2/2021         |                                     | H5N1    |
| <a href="#">EPI_ISL_7733585</a>  | EPI1944253 | EPI1944254 | EPI1944252 | EPI1944256 | EPI1944249 | EPI1944255 | EPI1944251 | EPI1944250 | A/Eurasian_wigeon/Italy/21VIR8919-3/2021 |                                     | H5N1    |
| <a href="#">EPI_ISL_7733642</a>  | EPI1944458 | EPI1944459 | EPI1944457 | EPI1944461 | EPI1944454 | EPI1944460 | EPI1944456 | EPI1944455 | A/kestrel/Italy/21VIR10468/2021          | *                                   | H5N1    |
| <a href="#">EPI_ISL_7733621</a>  | EPI1944370 | EPI1944371 | EPI1944369 | EPI1944373 | EPI1944366 | EPI1944372 | EPI1944368 | EPI1944367 | A/seagull/Italy/21VIR9432-2/2021         | *                                   | H5N1    |
| <a href="#">EPI_ISL_7733612</a>  | EPI1944346 | EPI1944347 | EPI1944345 | EPI1944349 | EPI1944342 | EPI1944348 | EPI1944344 | EPI1944343 | A/magpie/Italy/21VIR9487-2/2021          |                                     | H5N1    |
| <a href="#">EPI_ISL_7733611</a>  | EPI1944338 | EPI1944339 | EPI1944337 | EPI1944341 | EPI1944334 | EPI1944340 | EPI1944336 | EPI1944335 | A/Wild_goose/Italy/21VIR10193/2021       |                                     | H5N1    |
